# Supplementary material for: A KRAS-responsive long non-coding RNA controls microRNA processing
Source: PubMed Central journal article supplement (PMC8016872; doi:10.1038/s41467-021-22337-3), 2021-04-01
Supplement: 41467_2021_22337_MOESM1_ESM.pdf [file 41467_2021_22337_MOESM1_ESM.pdf]

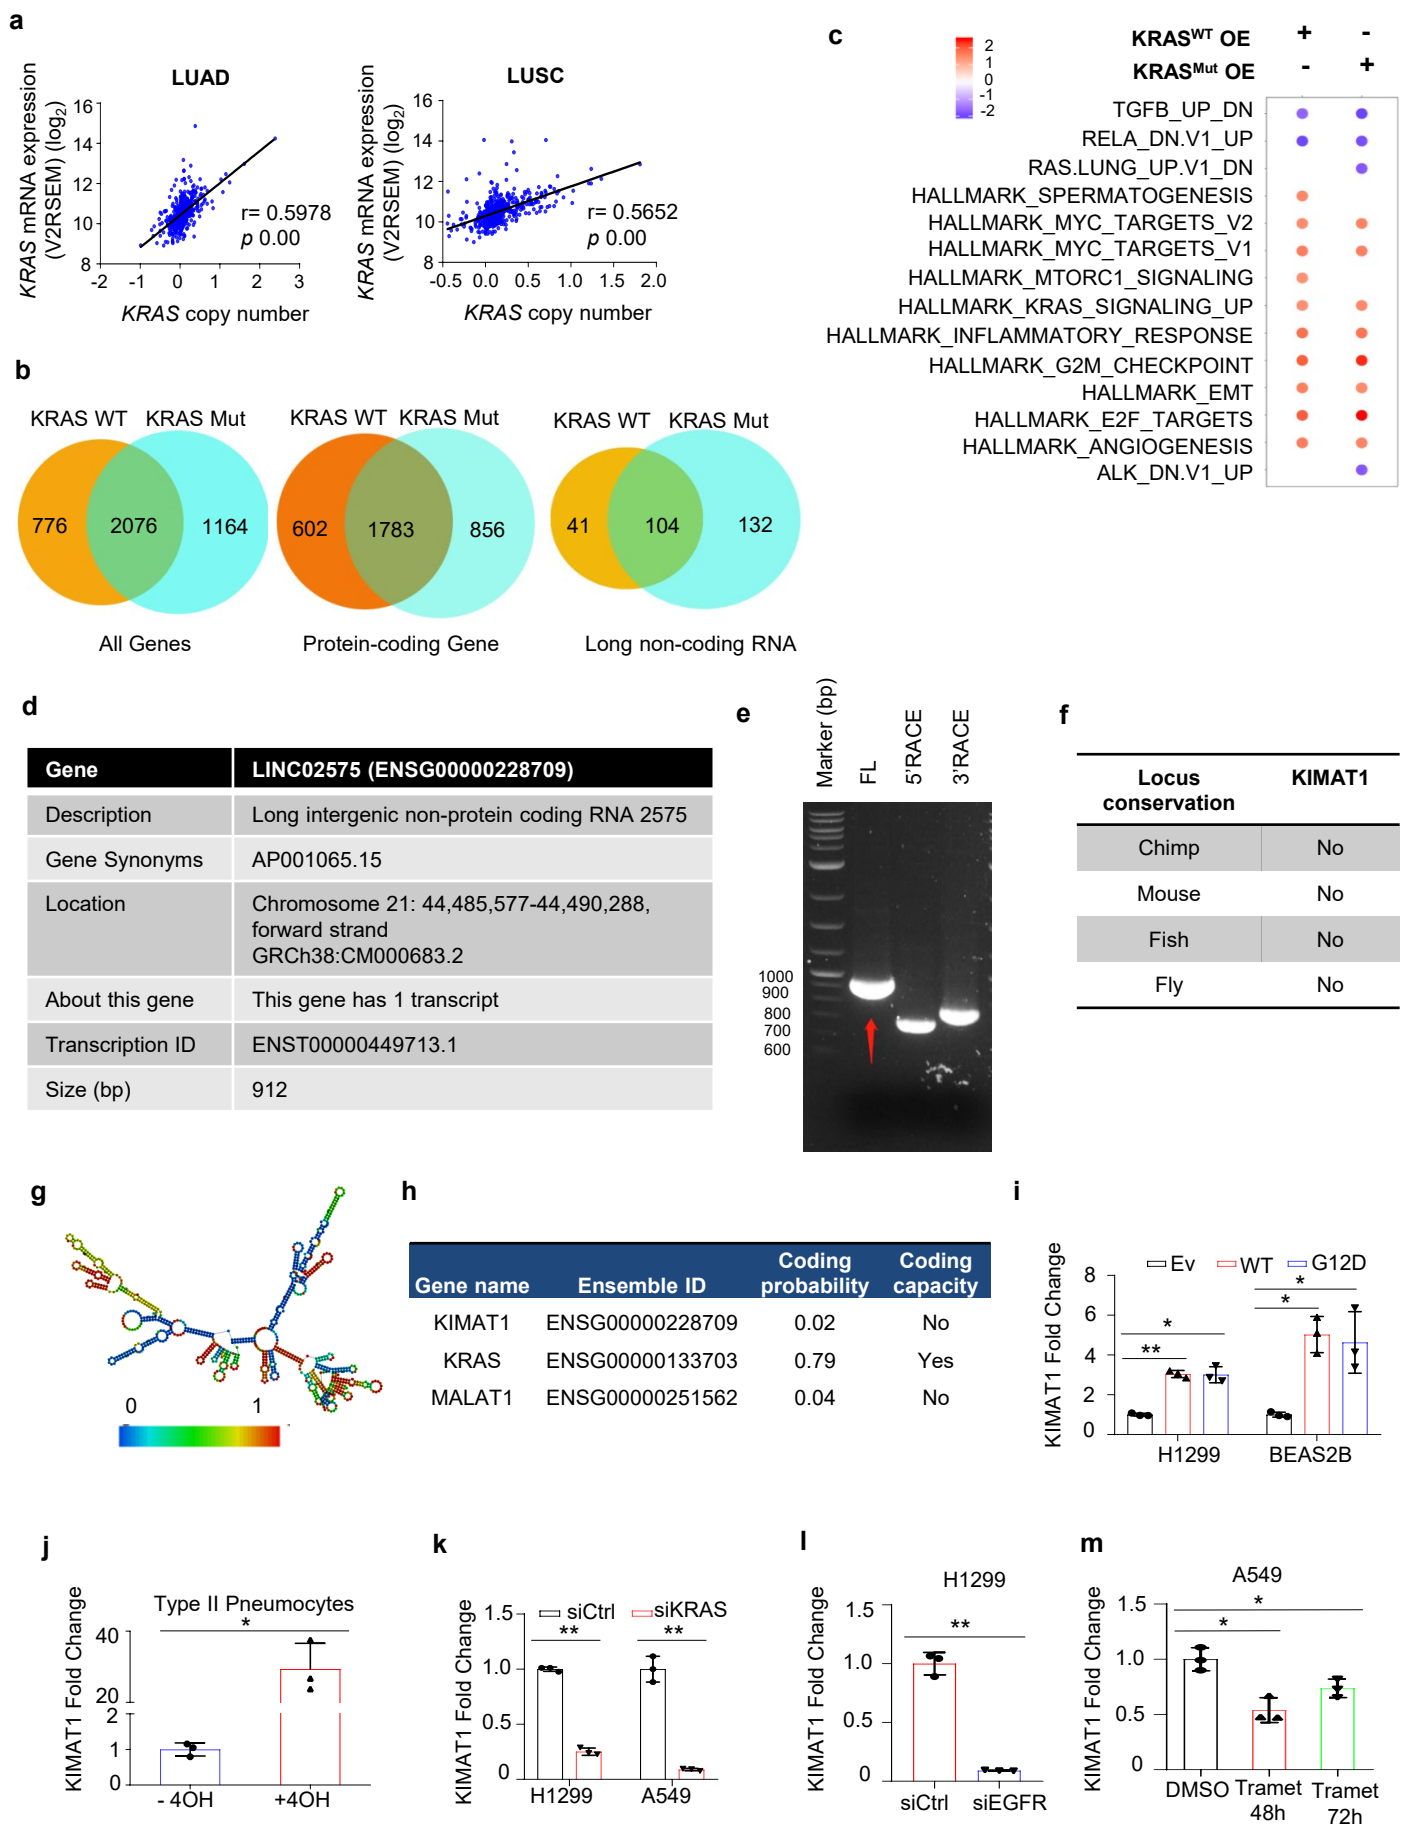

**Supplementary Figure 1: *KIMAT1* is a downstream effector of *KRAS*.** **a**, *KRAS* mRNA expression positively correlates with *KRAS* DNA copy number in LUAD and LUSC datasets (TCGA). On the x axis is reported the SNP-array-inferred *KRAS* copy number, on the y axis is reported *KRAS* mRNA expression by RNA-seq set to log<sub>2</sub> scale. **b**, Number of genes in common between *KRAS*<sup>WT</sup> and *KRAS*<sup>Mut</sup>. **c**, GSEA analysis of pathways commonly modulated by *KRAS*<sup>WT</sup> and *KRAS*<sup>Mut</sup>. The heatmap indicates the GSEA scores. **d**, *KIMAT1* isoform and location (Gene official symbol linc02575) from Ensembl. **e**, *KIMAT1* full length was determined by 5' (lane 2) and 3' (lane 3) rapid-amplification of cDNA ends (RACE) assays. *KIMAT1* total length is 912 nucleotides (lane 1, red arrow). Data are representative of 2 independent experiments. **f**, As annotated in LNCipedia, *KIMAT1* is not conserved in other species. **g**, RNAfold prediction of base-pairing probabilities of *KIMAT1* secondary structure with a minimum free energy (MFE) of -337.53 kcal/mol indicating that the structure is in thermodynamic ensemble. The colour scale indicates the confidence of the prediction for each base. **h**, Coding probability scores for *KIMAT1* were assessed by Coding Potential Assessment Tool (CPAT). *KRAS* and *MALAT1* were used as positive and negative controls, respectively. **i**, qRT-PCR for *KIMAT1* 48h after transfection with *KRAS*<sup>WT</sup> or *KRAS*<sup>G12D</sup> in H1299 or BEAS2B cells. H1299 \*\*= 5.23E-05, \*= 0.0010; BEAS2B \*= 0.0016 and 0.01548 from left to right. **j**, qRT-PCR for *KIMAT1* in Type II Pneumocytes *KRAS*<sup>G12V</sup>-inducible cells after treatment with 4-Hydroxytamoxifen (4OH) to activate *KRAS*. \*= 0.002489. **k**, qRT-PCR for *KIMAT1* upon *KRAS* silencing in H1299 and A549 cells. \*\*= 4.73E-06 (H1299) and 0.00018 (A549). **l**, Downregulation of *KIMAT1* determined by qRT-PCR in cells transfected with a pool of 4 siRNA targeting the EGFR compared to cells transfected with a non-targeting siRNA (siCtrl). \*\*= 8.05E-05. **m**, qRT-PCR for *KIMAT1* in A549 cells after treatment with trametinib for 48h or 72h. \*= 0.006478 (Tramet 48h vs Ctrl) and 0.02732 (Tramet 72h vs Ctrl). Error bars represent mean ± S.D (n=3) in panels with error bars. \*\**p* values were calculated by two-tailed Student's *t* test.

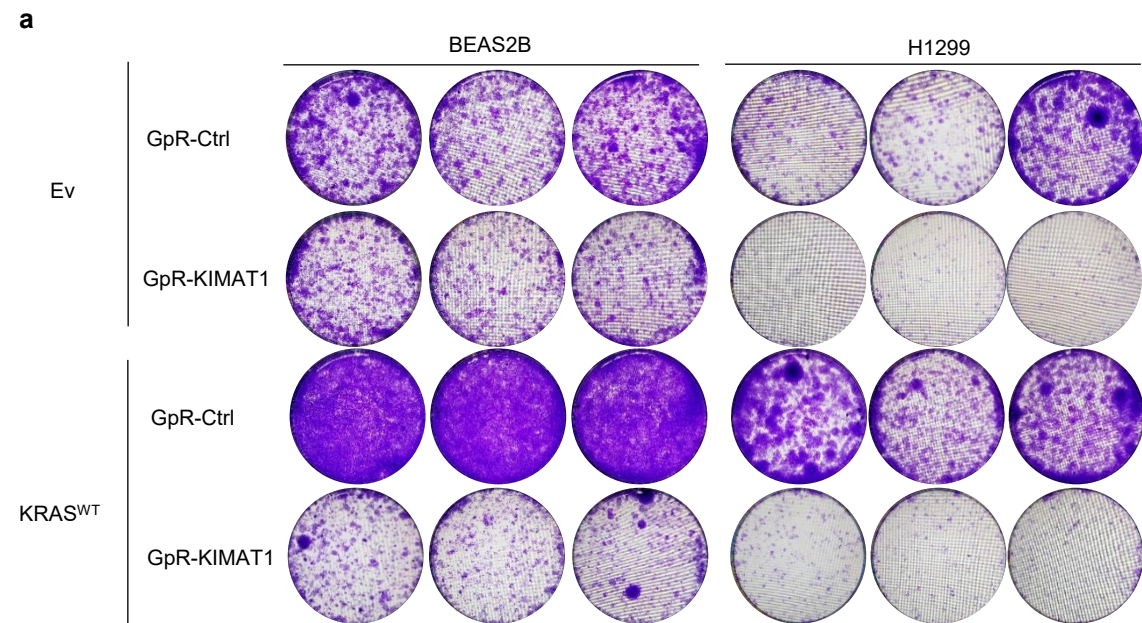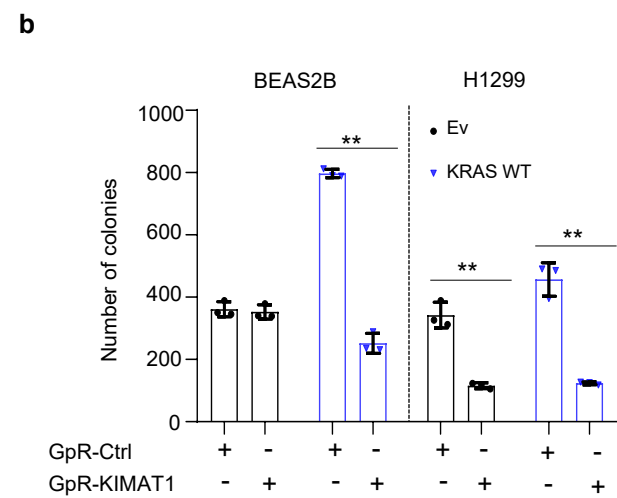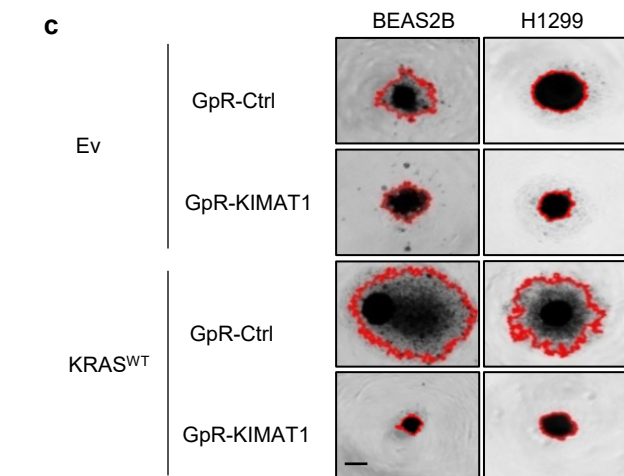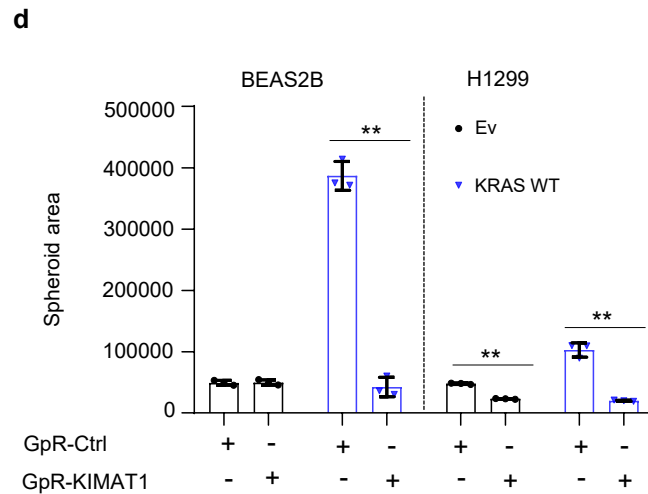

**Supplementary Figure 2: *KIMAT1* is a downstream effector of KRAS.**

**a-d**, Colony formation (a,b) and 3D cell invasion (c,d) assays and corresponding quantification in BEAS2B and H1299 cells stably expressing KRAS<sup>WT</sup> upon silencing of *KIMAT1*. Scale bar, 500  $\mu$ m. Error bars represent mean  $\pm$  S.D (n=3) in panels with error bars. *p* values from left to right \*\*= 1.11E-05, 0.000735, 0.000423 (b); 3.04E-05, 6.49E-06, 0.00025 (d).by two-tailed Student's *t* test.

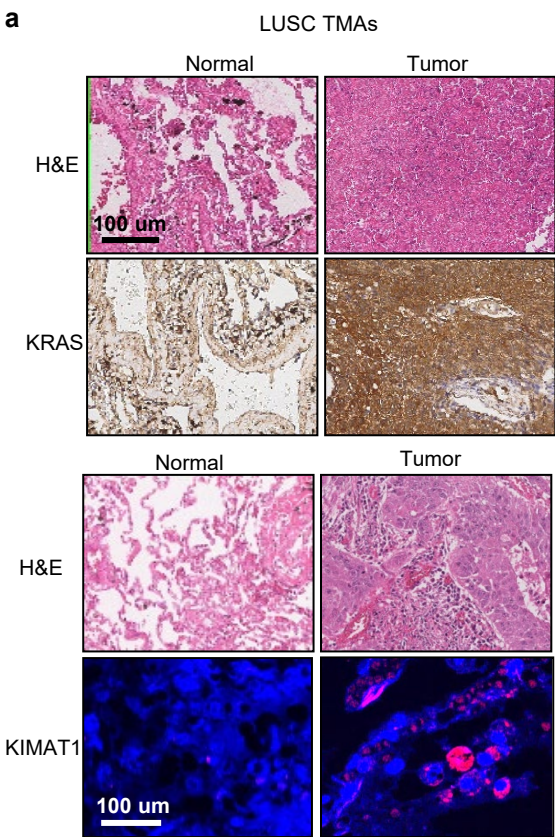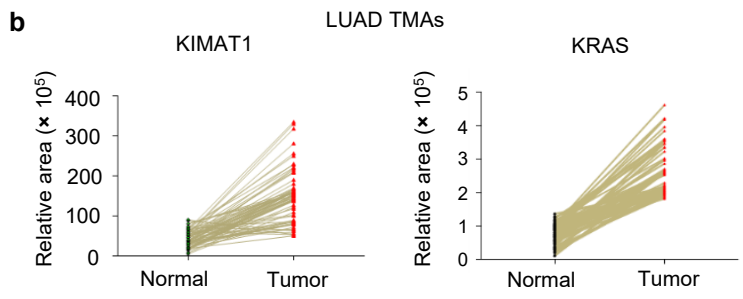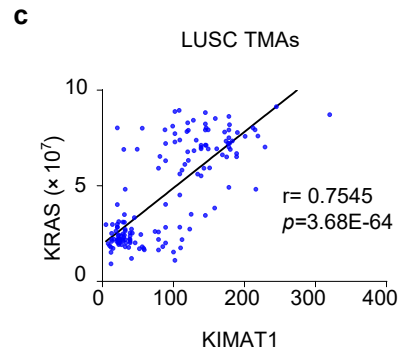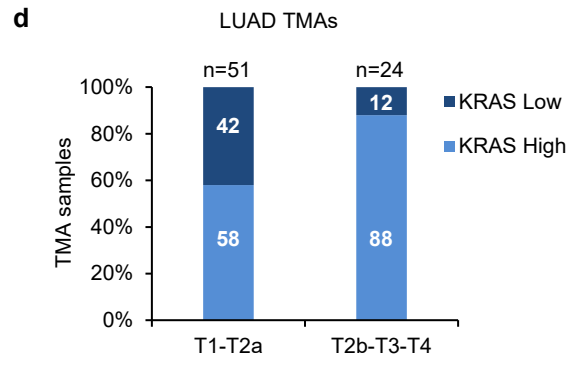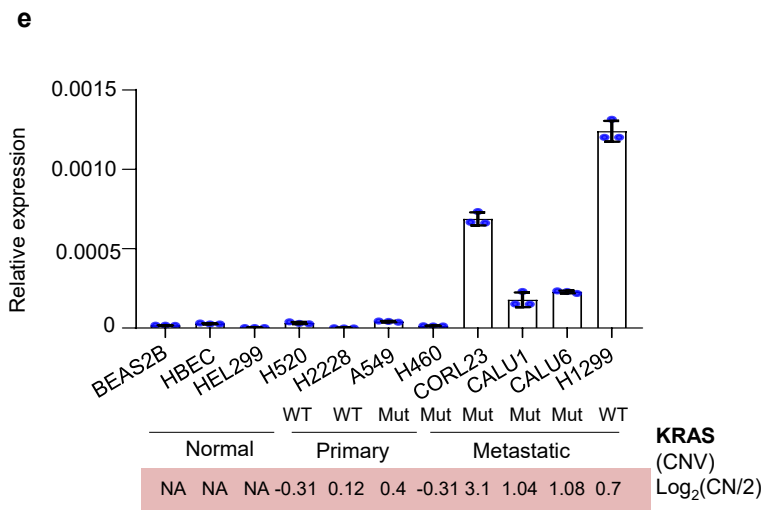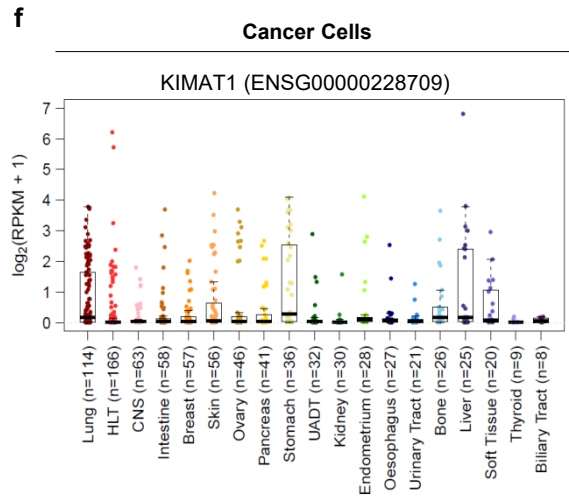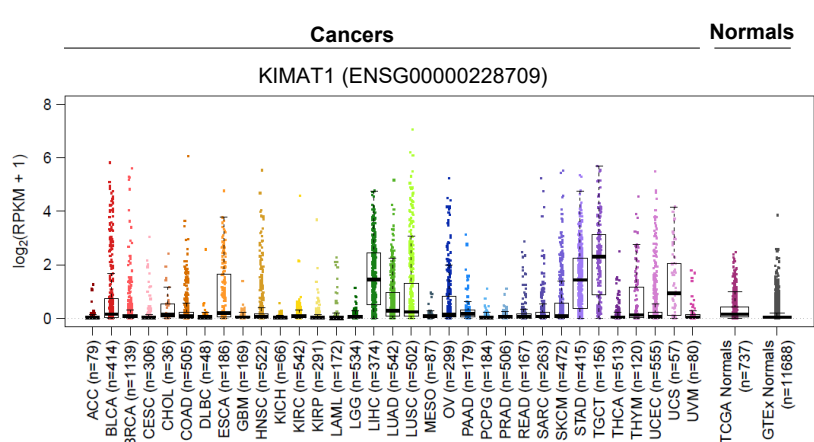

**Supplementary Figure 3: *KIMAT1* is overexpressed in lung squamous cell carcinoma and other cancer types.** **a,b** IHC for KRAS, smRNA FISH for *KIMAT1* and corresponding quantification of KRAS and *KIMAT1* expression levels in 75 FFPE LUSC lesions compared to 75 matched normal lung samples. Spots were counted using the online JAVA software from StarSearch. **c**, Pearson correlation between *KIMAT1* and *KRAS* in matched normal/tumor LUSC samples. *p* values were calculated by two-tailed Student's *t* test. **d**, KRAS expression (%) in early-stage versus late-stage tumors shown in Fig. 1e. **e**, qPCR for *KIMAT1* expression in a panel of normal, primary and metastatic lung adenocarcinoma and squamous cell carcinoma cell lines. *KRAS* copy number ( $\log_2\text{CN}/2$ ) for the indicated cells reported in the table was downloaded from CCLE data portal. Mean  $\pm$  S.D (n=3). **f**, (Left) *KIMAT1* expression in 863 different cancer cell lines from CCLE. HLT: Haematopoietic and Lymphoid Tissue; CNS: Central Nervous System; UADT: Upper Aerodigestive Tract. (Right) *KIMAT1* expression in 33 TCGA tumor types (n=10480), NAT (Normal adjacent to tumors, n=737) and GTEx normal tissue RNAseq datasets (n=11688). See Source File.

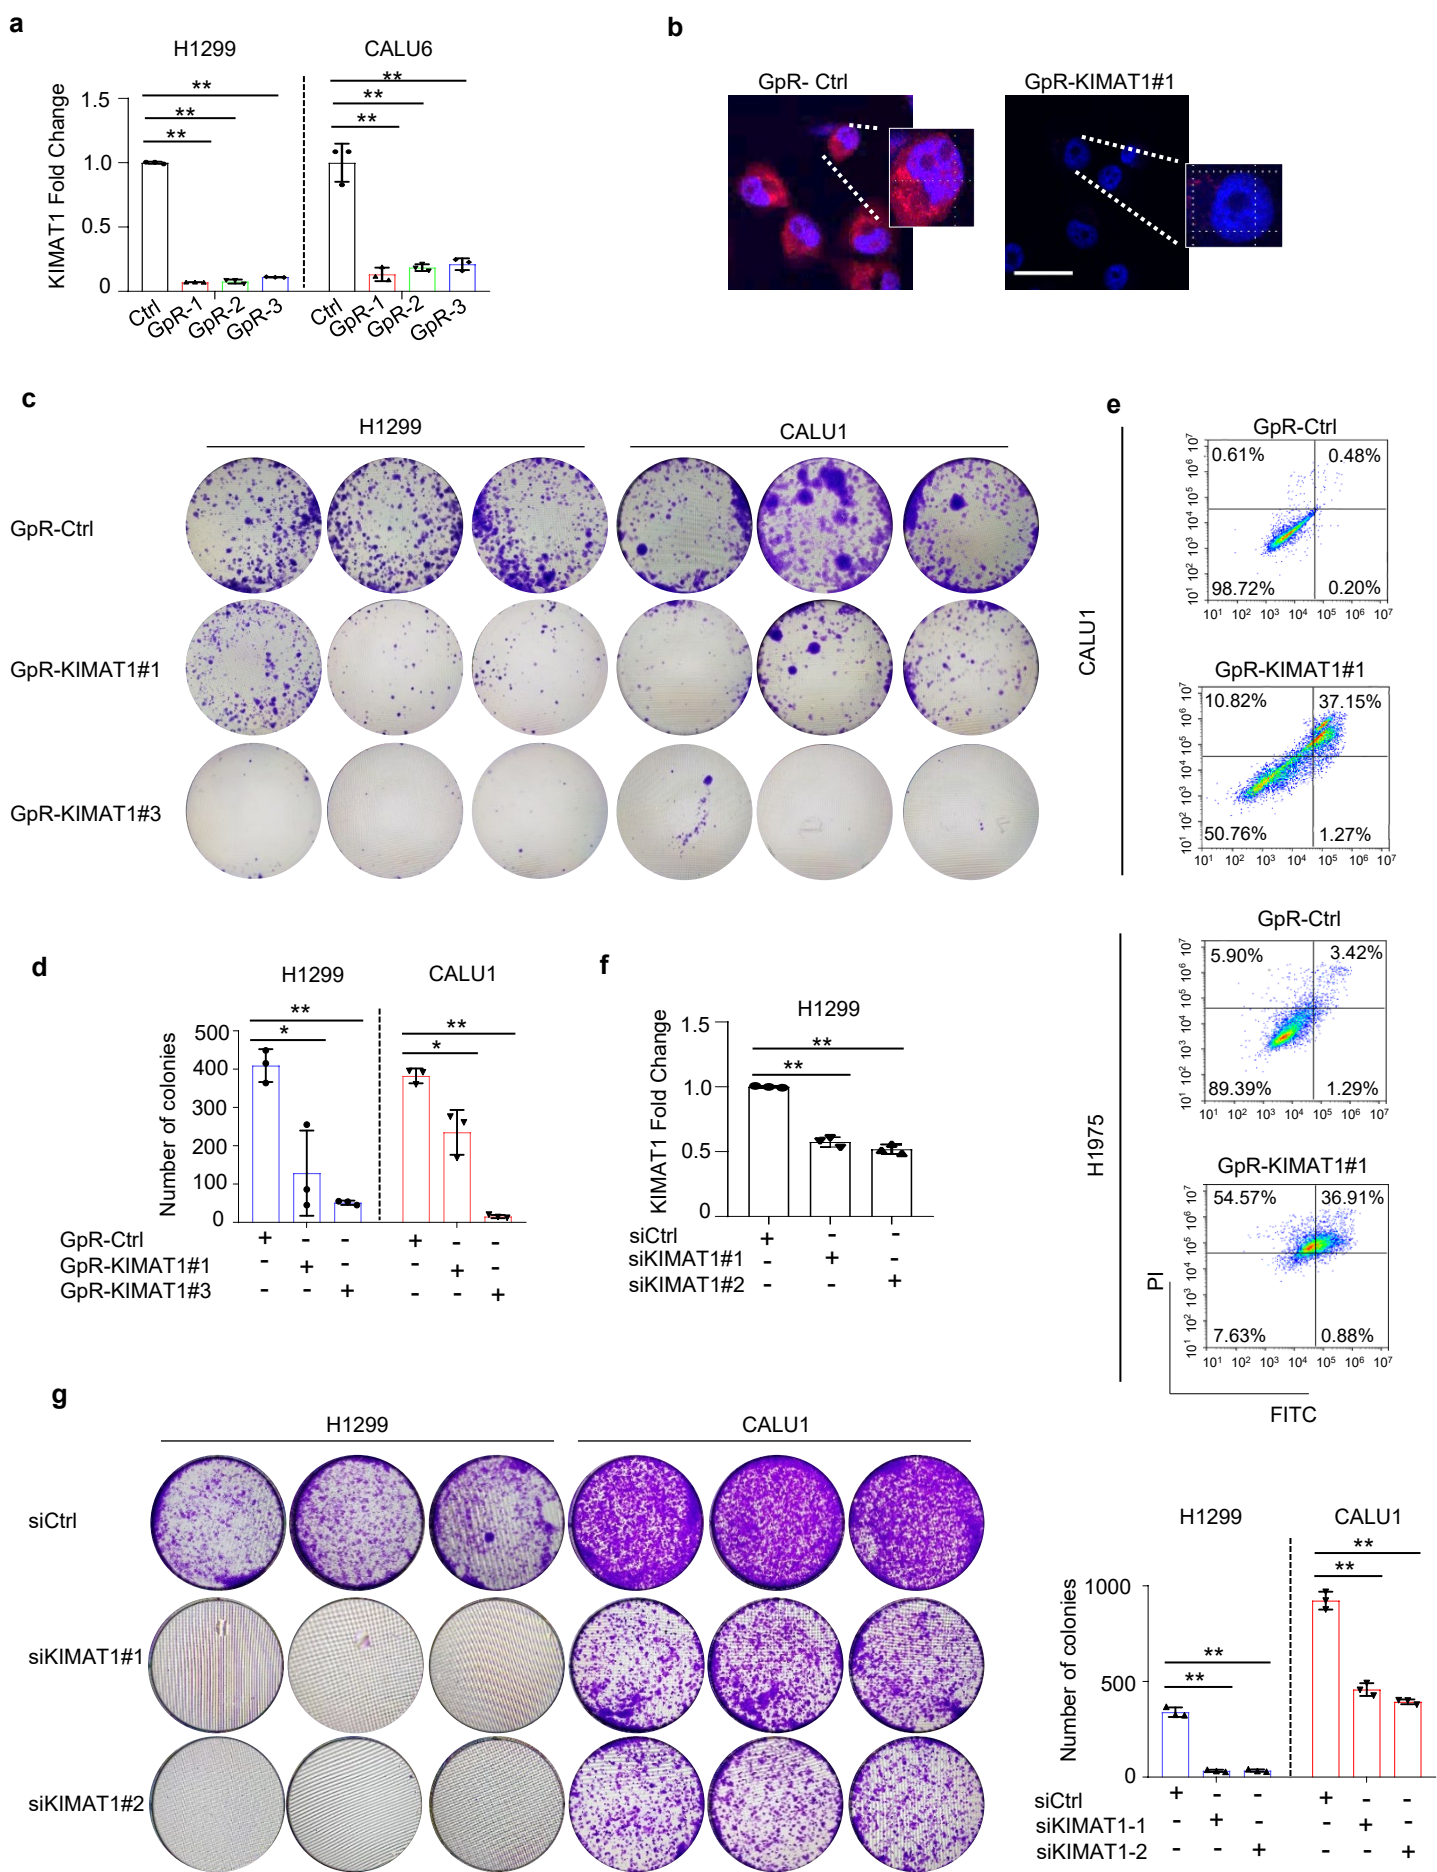

**Supplementary Figure 4: *KIMAT1* is essential for cancer cell survival.** **a**, *KIMAT1* KD efficiency 48h after transfection with a non-targeting GpRs (Ctrl) or three independent GpRs targeting *KIMAT1* in H1299 and CALU6 cells. \*\*= 3.65E-09, 9.09E-08, 5.09E-09 (H1299); 0.000673, 0.000723 and 0.000921 (CALU6) from left to right. **b**, Confocal microscopy images of *KIMAT1* smFISH stained with custom-designed Stellaris probes in H1299 cells upon *KIMAT1* GpRs transfection. Staining performed for DAPI (blue) and *KIMAT1* (red). Scale bar, 75  $\mu$ m. **c,d**, Colony formation assay (c) and corresponding number of colonies quantification (d) represented as the average number of colonies of three biological replicates  $\pm$  S.D. upon transfection with *KIMAT1* GpRs. *p* values = 0.0151 and 0.000136 (H1299); 0.014376 and 5.66E-06 (CALU1) from left to right. **e**, *KIMAT1* silencing in CALU1 and H1975 cells induces prominent cell death. **f**, qPCR for *KIMAT1* upon transfection of H1299 cells with two independent siRNAs. \*\*= 4.50E-05 and 2.41E-05 from left to right. **g**, Colony formation assay and corresponding number of colonies quantification in H1299 and CALU1 cells upon *KIMAT1* silencing using two independent *KIMAT1* siRNAs. *p* values= 3.13E-05 and 3.25E-05 (H1299); 0.000147 and 4.52E-05 (CALU1) from left to right. Error bars represent mean  $\pm$  S.D (n=3), *p* values were calculated by a two-tailed Student's *t* test.



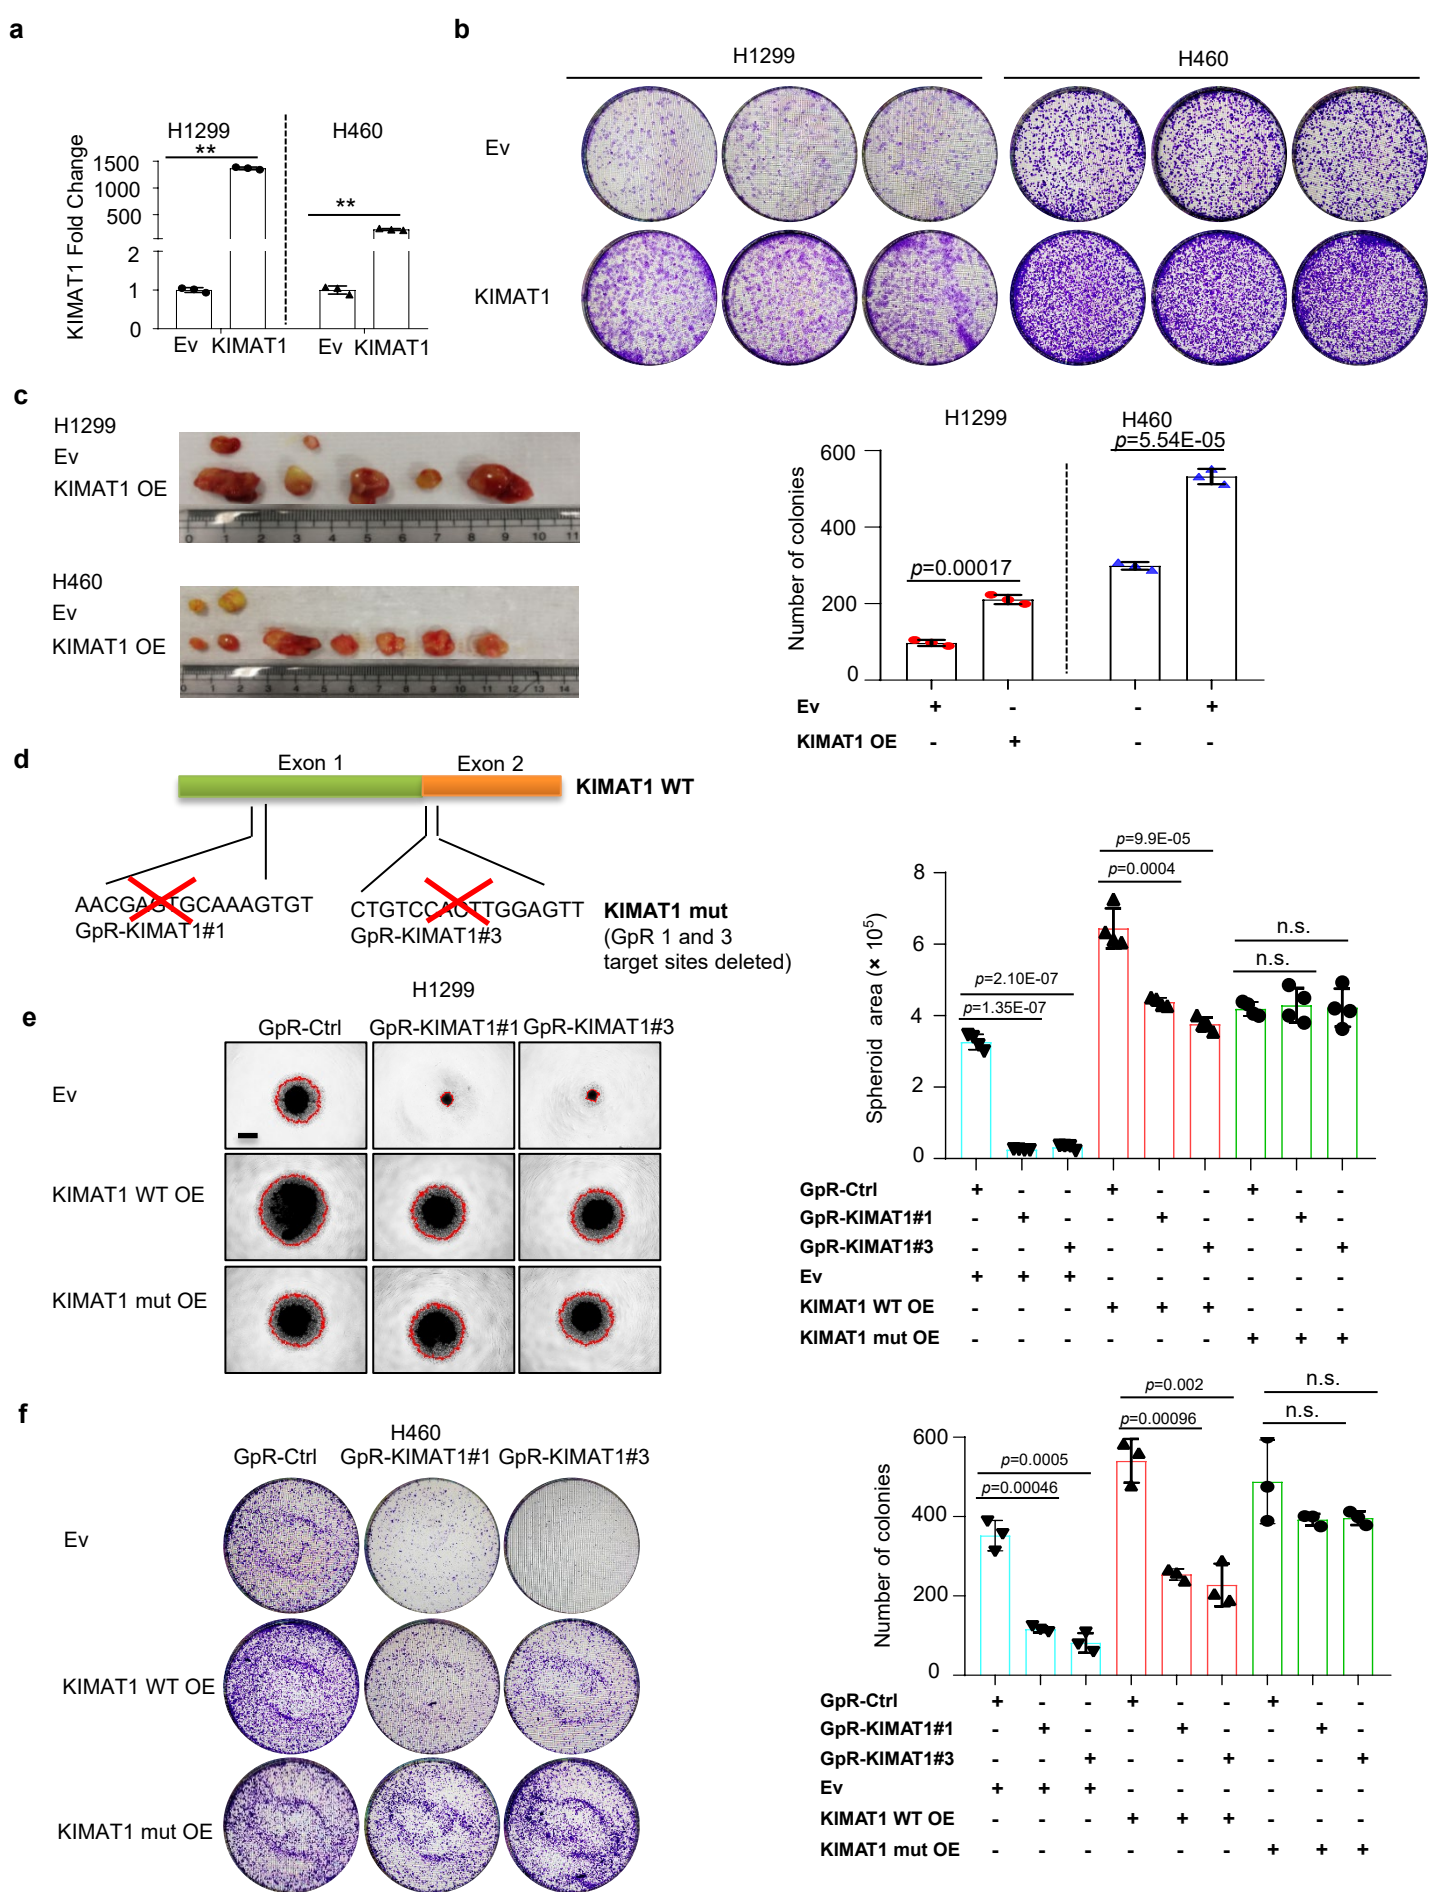

**Supplementary Figure 5: *KIMAT1* promotes cell proliferation *in vitro* and *in vivo*.** **a**, qRT-PCR showing *KIMAT1* induction in cells with stable lentiviral *KIMAT1* OE. \*\*=6.14E-08 (H1299) and 2.59E-05 (H460). **b**, Colony formation assay and corresponding number of colonies quantification (represented as the mean number of colonies of three biological replicates  $\pm$  S.D.) in H1299 and H460 cell lines with stable *KIMAT1* OE. \*\*= 0.00017 (H1299) and 5.54E-05 (H460). **c**, Photographs of all tumors harvested from NSG mice subcutaneously injected with H1299 and H460 cell lines overexpressing *KIMAT1*. **d**, Schematic representation of the *KIMAT1* sequences deleted to generate GpR resistant (mutant) *KIMAT1*. **e-f**, Overexpression of wild-type *KIMAT1* and not of mutant *KIMAT1* (d) halted proliferation (e) and tumorsphere formation (f) in H1299 and H460 cells transfected with *KIMAT1* GpRs. Scale bar, 500  $\mu$ m. Error bars represent mean  $\pm$  S.D (a, b and f, n=3; e, n=4), p values were calculated by a two-tailed Student's *t* test.

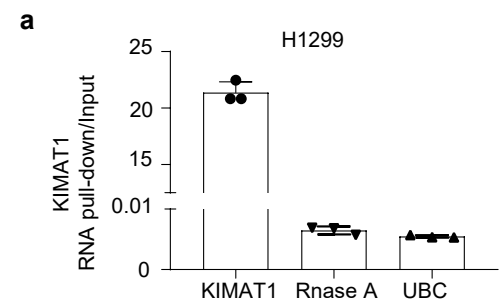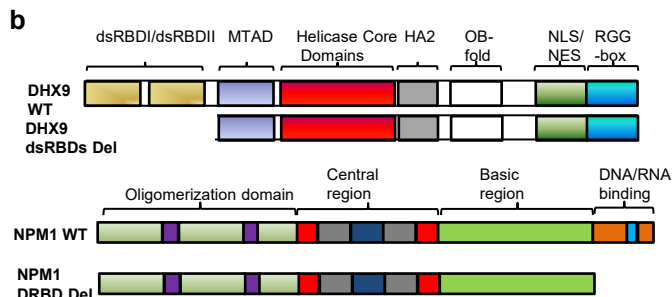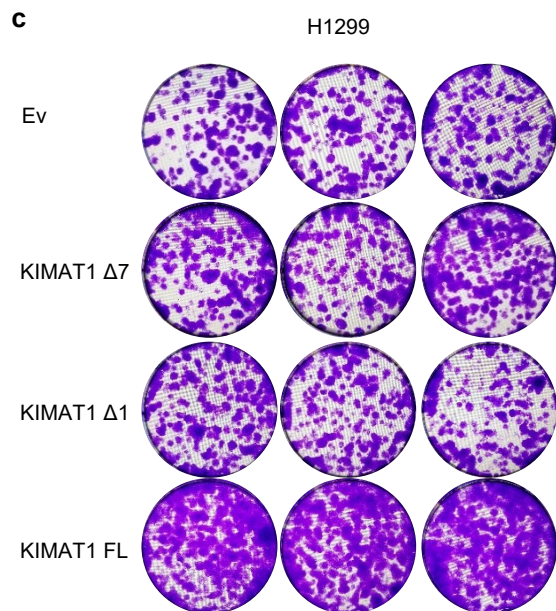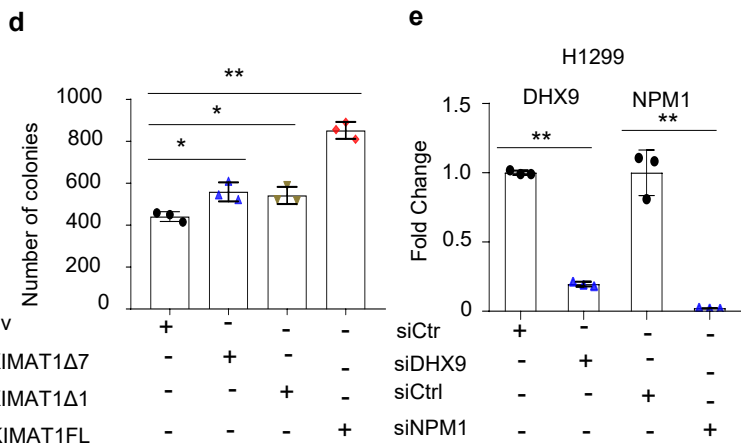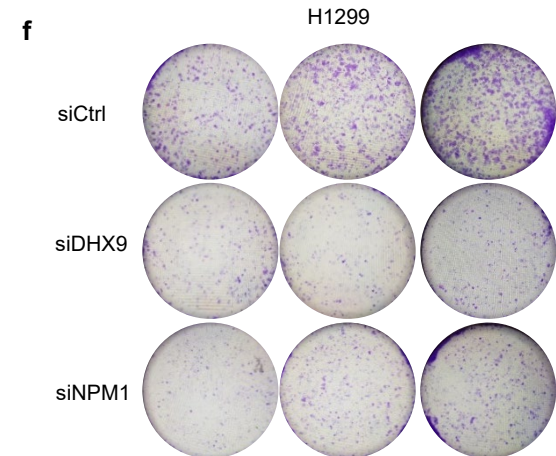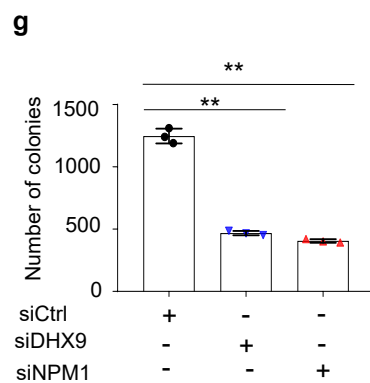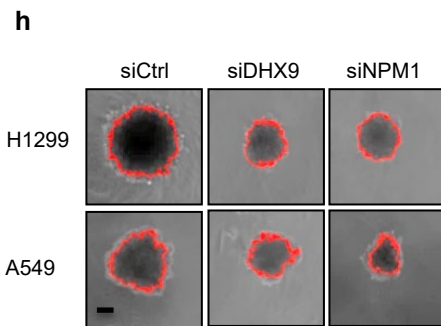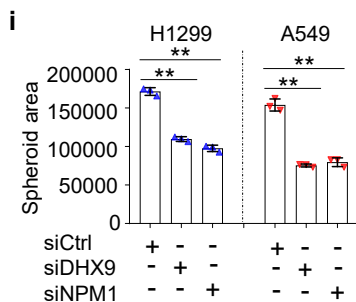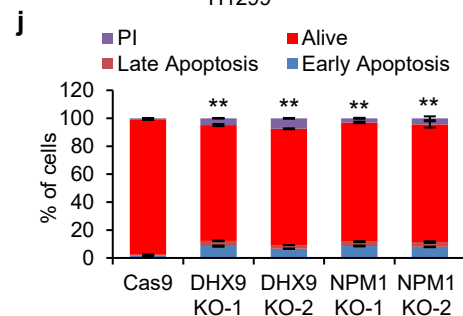

**Supplementary Figure 6: DHX9 and NPM1 mediate *KIMAT1* functional effects.** **a**, Pull-down efficiency of *KIMAT1* using *KIMAT1* biotinylated probes. **b**, Schematic representation of DHX9 and NPM1 functional domains. dsRBD, double-stranded RNA binding domain; MTAD, minimal transactivation domain; HA2, helicase-associated domain 2; OB-fold, oligonucleotide/oligosaccharide-binding fold; NLS, nuclear localization signal; NES, nuclear export signal. **c,d**, Colony formation assay (c) and corresponding number of colonies quantification (d) represented as the mean number of colonies of three biological replicates  $\pm$  S.D. in H1299 cells upon ectopic expression of either *KIMAT1* full length or deletion constructs. *KIMAT1* $\Delta$ 7 indicate the fragments without the motif binding to DHX9, *KIMAT1* $\Delta$ 1 indicates the fragment without the motif binding to NPM1. FL, full length. *p* values= 0.016, 0.021 and 0.0001 from left to right. **e**, qPCR for DHX9 and NPM1 following transfection with a pool of 4 different DHX9 and NPM1 siRNAs. *p* values= 4.67E-07 and 0.0005 from left to right. **f,g**, Clonogenic assay (f) and relative quantification (g) 10-15 days after seeding  $5.0 \times 10^3$  H1299 cells upon transfection with DHX9 or NPM1 siRNA or a non-targeting siRNA, represented as the mean number of colonies of three biological replicates  $\pm$  S.D. *p* values= 2.69E-05 and 1.87E-05 from left to right. **h,i**, 3D *in vitro* tumorsphere formation assay (h) after transfection with a non-targeting siRNA (siCtrl) or siRNA targeting NPM1 or DHX9 and quantification (i) of the tumorsphere area of three biological replicates  $\pm$  S.D. *p* values= 5.057E-05 and 3.859E-05 (H1299); 7.269E-05 and 0.0001818 (A549) from left to right. Scale bar, 500  $\mu$ m. **j**, Annexin V assay in two different DHX9 KO and NPM1 KO clones. *p* values= 1.65E-05, 7.24E-07, 5.52E-06, 2.07E-06 from left to right. Error bars represent mean  $\pm$  S.D (n=3) in panels with error bars. *p* values were calculated by two-tailed Student's *t* test.

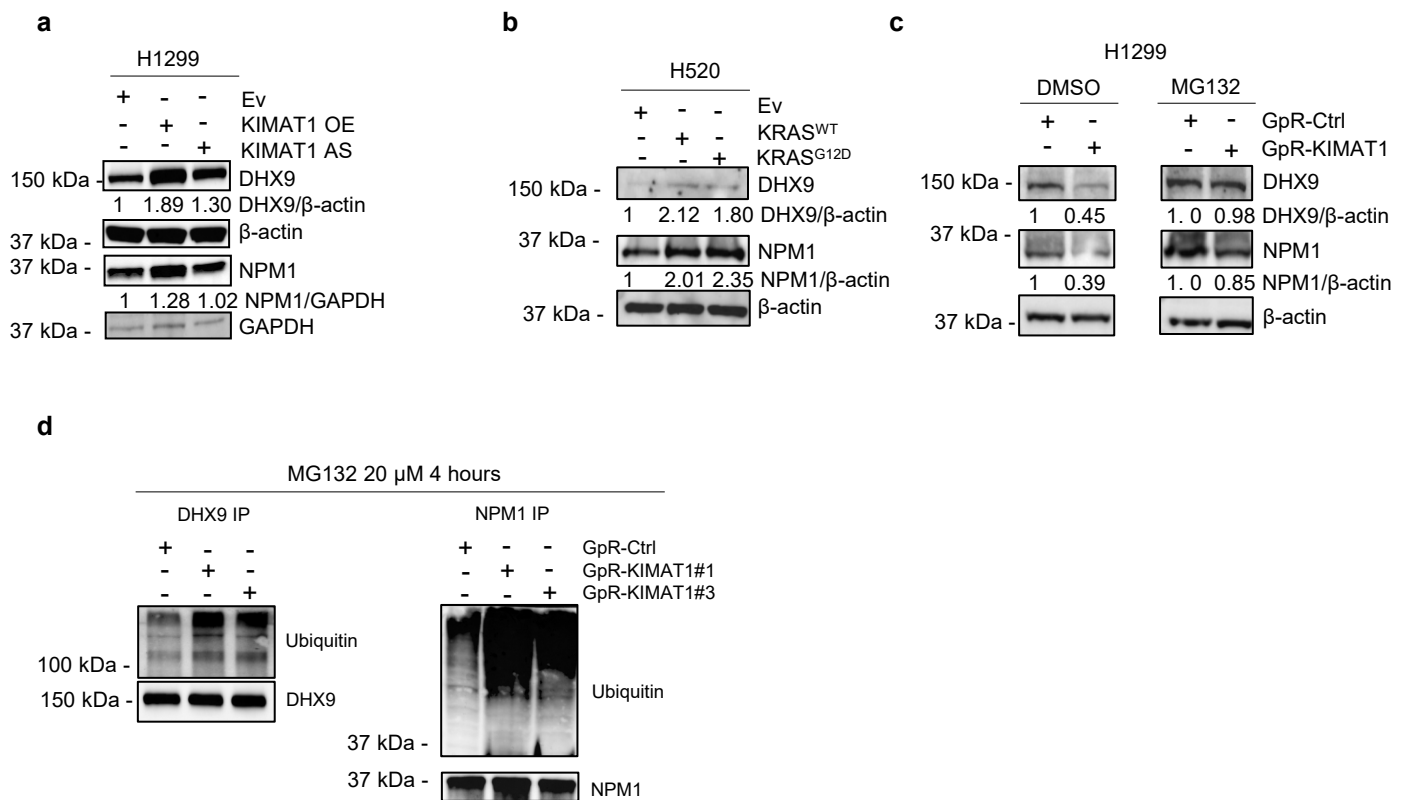

**Supplementary Figure 7: *KIMAT1* loss induces ubiquitin-mediated DHX9 and NPM1 degradation.** **a**, DHX9 and NPM1 expression in H1299 cells stably expressing *KIMAT1* or *KIMAT1* antisense. **b**, Ectopic expression of KRAS<sup>WT</sup> or KRAS<sup>G12D</sup> induces DHX9 and NPM1 in H520 squamous cell carcinoma cells. **c**, Downregulation of DHX9 and NPM1 caused by *KIMAT1* silencing is rescued by MG132. **d**, *KIMAT1* silencing resulted in increased polyubiquitination of DHX9 and NPM1 in H1299 cells. a-d, Representative images of 2 biological replicates.

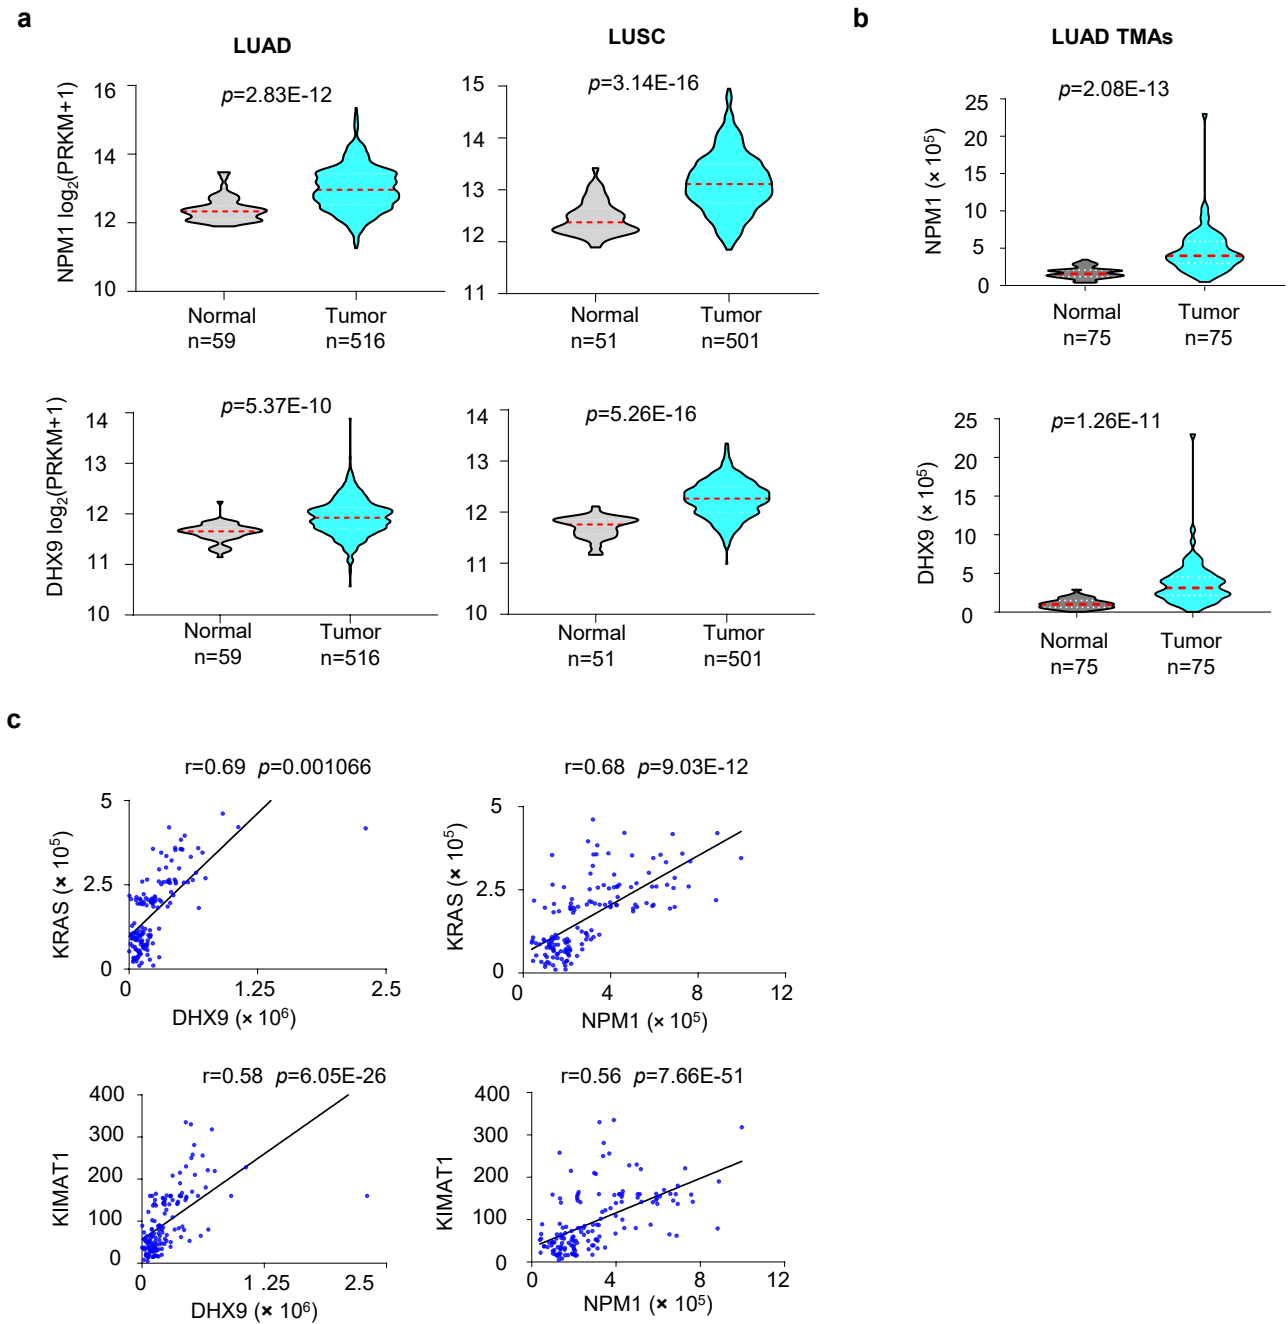

**Supplementary Figure 8: DHX9 and NPM1 are enriched in tumors versus normal lung and positively correlate with KRAS and *KIMAT1*.** **a**, DHX9 and NPM1 are enriched in LUAD and LUSC lesions compared to normal lung. **b,c**, DHX9 and NPM1 are enriched in FFPE lung adenocarcinoma lesions compared to normal lung and positively correlate with KRAS and *KIMAT1* by Pearson's rank correlation coefficient ( $r$ ).  $p$  values were calculated by two-tailed Student's  $t$  test.

**a**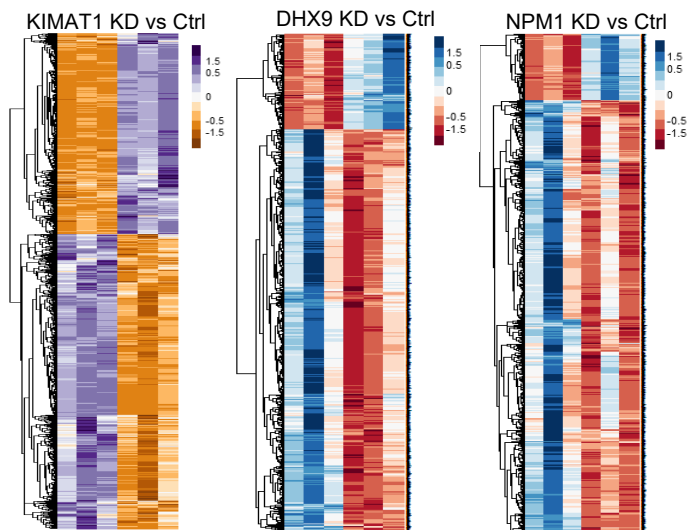**b**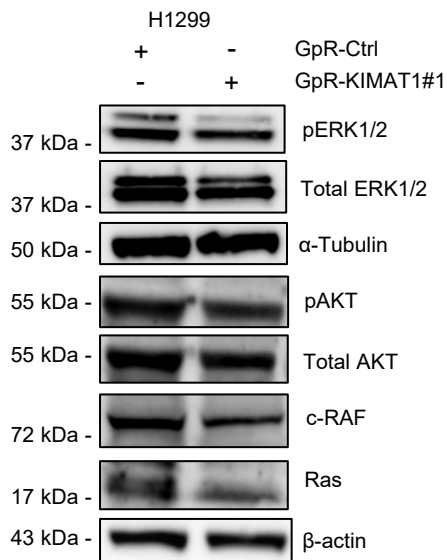**c**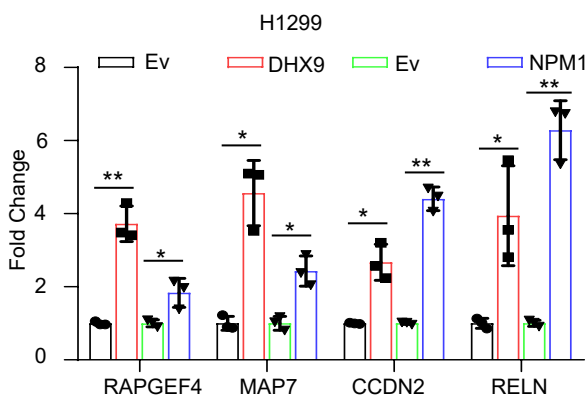**d**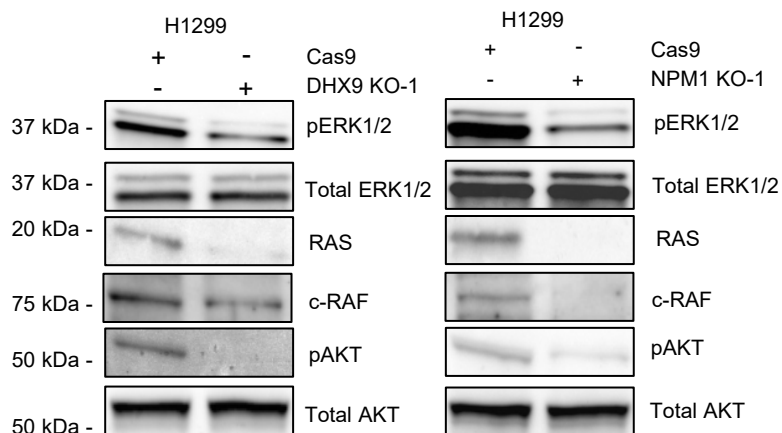**e**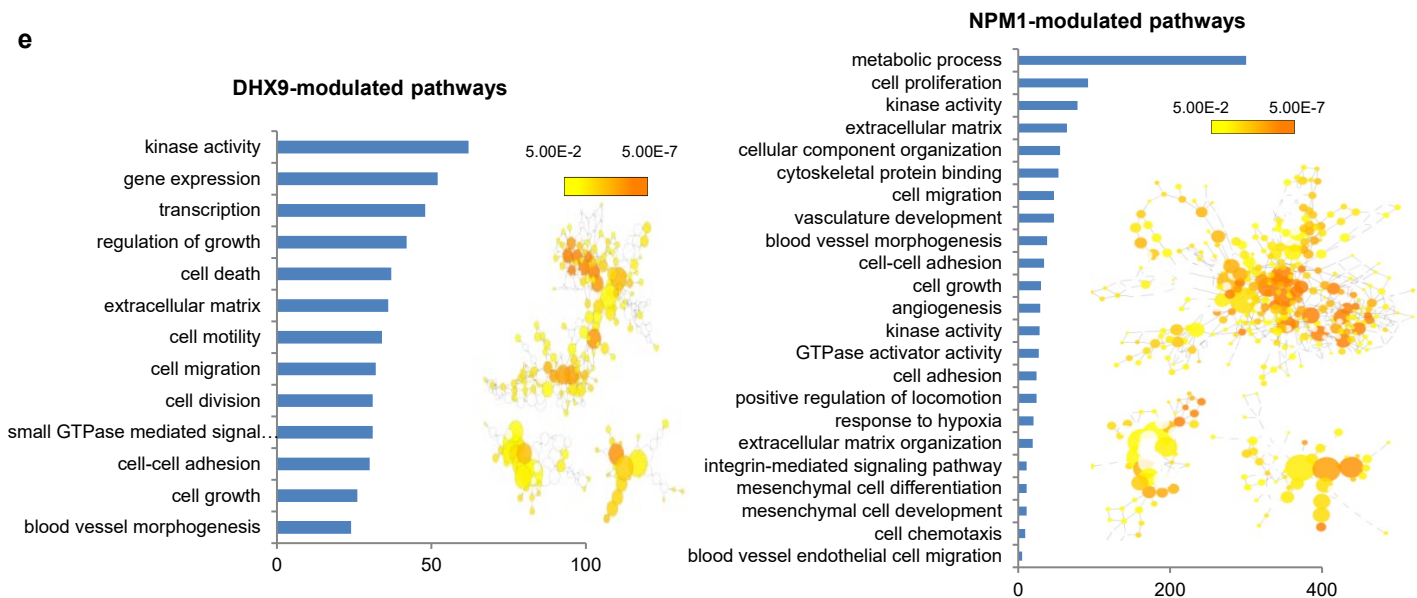

**Supplementary Figure 9: Genes and pathways modulated by *KIMAT1*, *DHX9* and *NPM1*.** **a**, Heatmaps showing dysregulated genes upon *KIMAT1*, *DHX9* or *NPM1* silencing using GpRs (*KIMAT1*) or a pool of 4 different siRNAs (*DHX9* and *NPM1*). **b**, Immunoblotting with the indicated antibodies upon *KIMAT1* silencing. Representative images of two biological replicates. **c**, qPCR analysis of *KRAS* target genes upon *DHX9* or *NPM1* KD in H1299 cells. Error bars represent mean  $\pm$  S.D (n=3), *p* values were calculated by a two-tailed Student's *t* test. *p* values= 0.0006, 0.024, 0.003, 0.006, 0.004, 5.35E-05, 0.021 and 0.0004 from left to right. **d**, Immunoblotting with the indicated antibodies in *DHX9* KO or *NPM1* KO cells. Representative images of two biological replicates. **e**, Gene Ontology (GO) enrichment analysis was performed for the significant differentially expressed genes (*DHX9*, n=5277; *NPM1*, n=6279) after *DHX9* or *NPM1* silencing using BINGO. GO themes involved in biological processes (GOBP), molecular functions (GOMF), and cellular components (GOCC) are shown. GO themes were sorted based on significant *p*-values. The color intensity of nodes refers to the corrected *p* value of ontology. The size of nodes refers to the numbers of genes that are involved in the ontology. *p* < 0.05 was considered statistically significant by a two-tailed Student's *t* test.



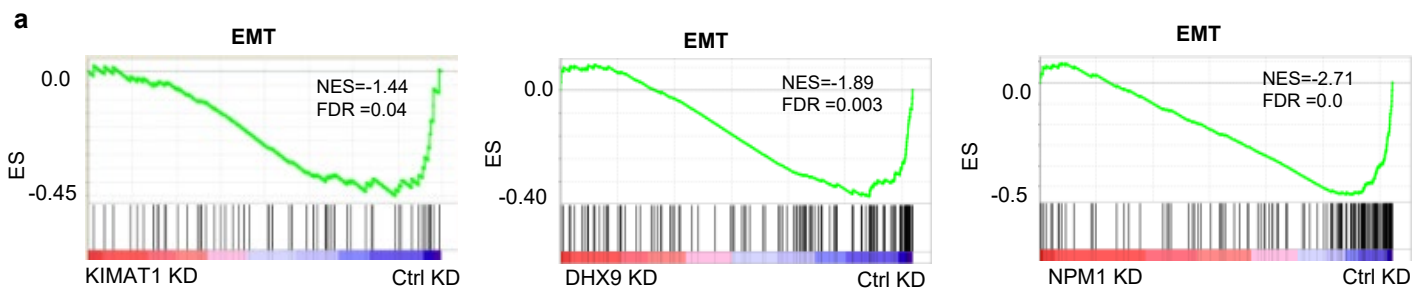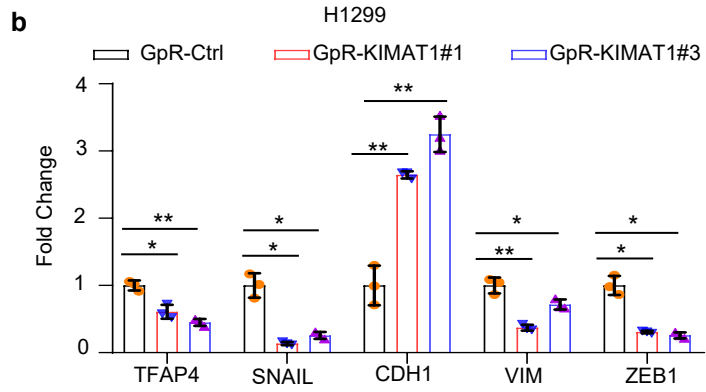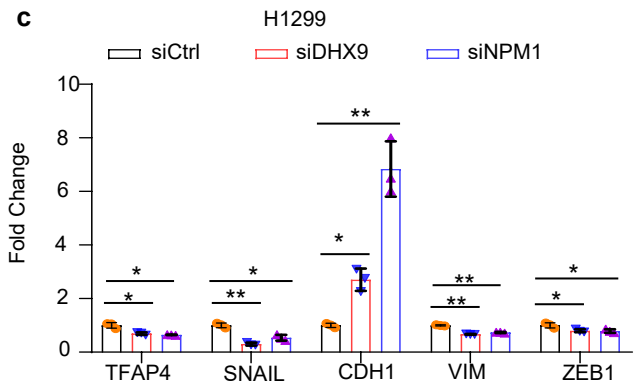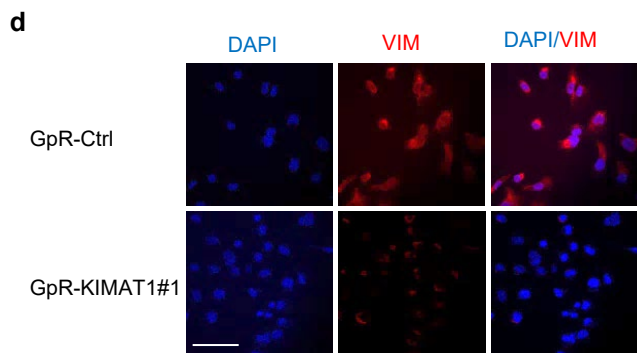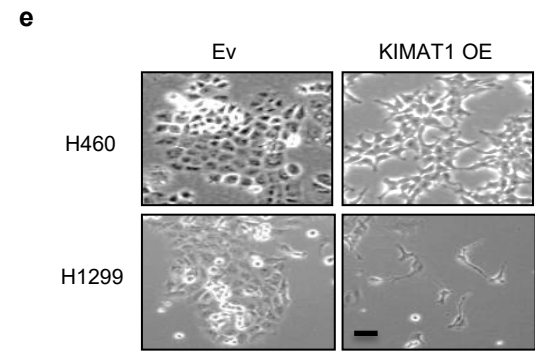

**Supplementary Figure 10: *KIMAT1*, *DHX9* and *NPM1* regulate EMT.** **a**, GSEA analysis showing enrichment of the EMT signature in *KIMAT1*-, *DHX9*- and *NPM1*-regulated genes. **b,c**, qPCR for several EMT markers upon *KIMAT1*, *DHX9* or *NPM1* silencing. Error bars represent mean  $\pm$  S.D (n=3), p values were calculated by a two-tailed Student's *t* test. p values= 0.006, 0.0005, 0.001, 0.002, 0.0007, 0.0006, 0.00097, 0.0242, 0.0011 and 0.001 (b); 0.009, 0.004, 0.0003, 0.004, 0.002, 0.0006, 1.49E-05, 8.25E-05, 0.037 and 0.038 (c) from left to right. **d**, Vimentin expression by immunofluorescence (red) in cells transfected with GpR-Ctrl or with GpR-*KIMAT1*. 40 x magnification. Scale bar, 75  $\mu$ m. Images are representative of two biological replicates. **e**, Representative photomicrographs depicting a morphological change in H460 and H1299 cells stably overexpressing *KIMAT1*. Scale bar, 500  $\mu$ m.

**a**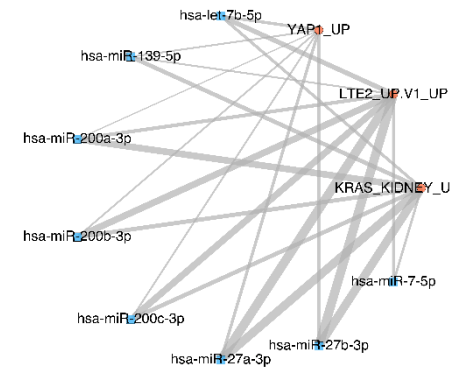**d**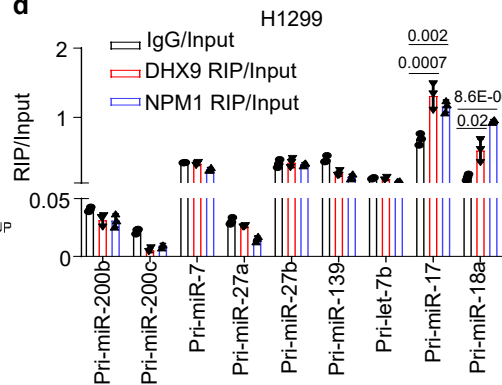**f**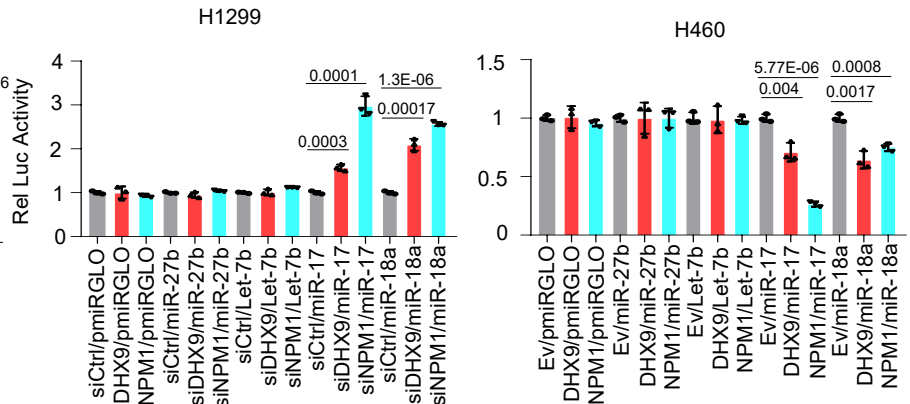**e**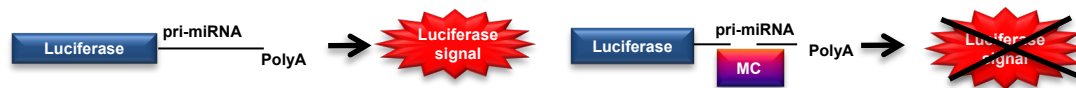**b**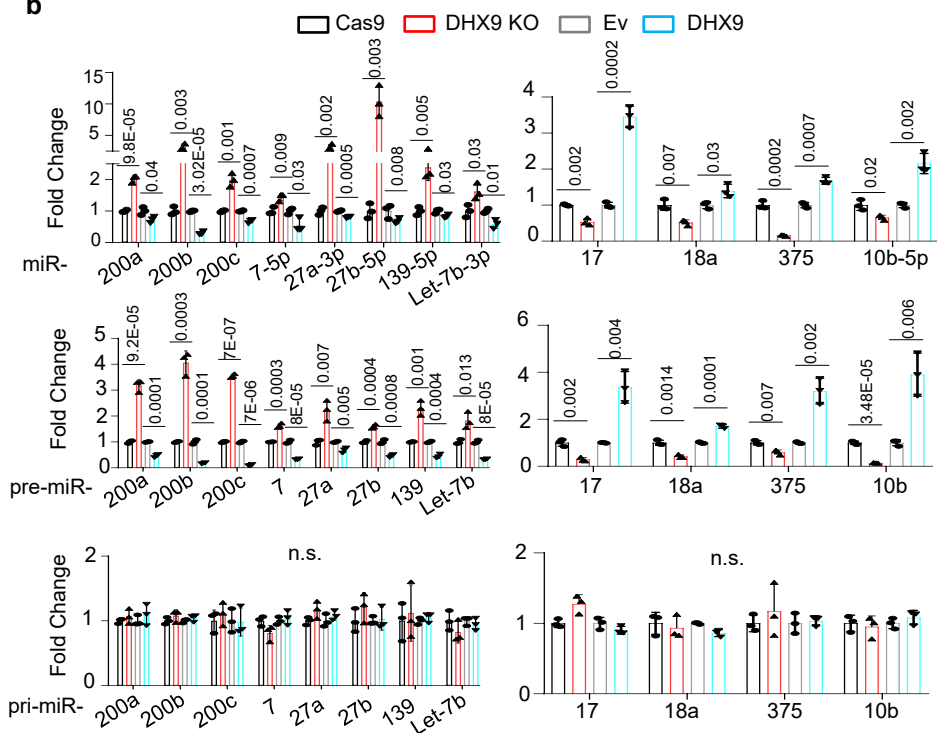**c**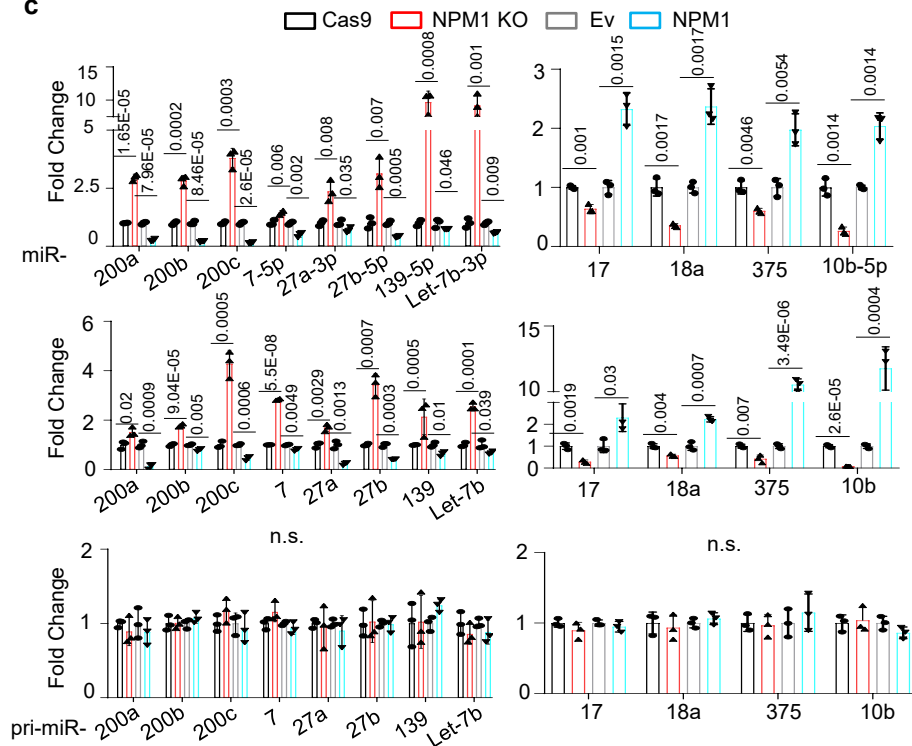

**Supplementary Fig. 11: DHX9 and NPM1 control miRNA processing.** **a**, Directed Network Diagram of Enriched Pathways regulated by *KIMAT1* within Predicted miRNA Targets derived from *KIMAT1* KD (DEGs with FDR<0.05 which are also predicted to be miRNA targets by Targetscan [release 7.2 – default predictions]). The statistical method to obtain the DEGs has been described in the legend of fig. 6a. The diagram displays miRNAs (blue squares) and pathways enriched (orange circles) (FDR<0.05; calculated using GSEA with DEGs from *KIMAT1* KD) and the connecting edges (gray). Edge-widths represent the number of DEGs contributing to the connection within each gene set. The network graph was produced using the igraph package (version 1.2.4.2). **b**, Expression levels of primary, precursors and mature forms of the indicated miRNAs were analysed by qPCR in DHX9 KO cells or in cells transfected with a DHX9 expression vector. Primary and precursor miRNAs were normalized to *β-actin*, and mature miRNAs were normalized to *RNU48*. **c**, Expression levels of primary, precursors and mature forms of the indicated miRNAs were analysed by qPCR after NPM1 silencing or overexpression in H1299 cells. Primary and precursor miRNAs were normalized to *β-actin* and mature miRNAs were normalized to *RNU48*. **d**, CLIP showing enrichment of TP and not TS miRNAs upon DHX9 or NPM1 pulldown. **e**, Schematic diagram of *in vivo* cellular monitoring assay of DHX9 and NPM1 function. MC=Microprocessor complex. **f**, H1299 and H460 cell lines were transfected with a luciferase vector carrying a segment of *pri-miR-27b*, *pri-let-7b*, *pri-miR-17* or *pri-miR-18a* between the luciferase gene and the polyadenylation signal. DHX9 or NPM1 silencing caused an increase of the luciferase activity in cells transfected with *pri-miR-17* or *pri-miR18a* and not in cells transfected with *pri-miR-27b* or *pri-let7b*. DHX9 or NPM1 OE sorted the opposite effect. Error bars represent mean ± S.D (n=3), *p* values were calculated by a two-tailed Student's *t* test.

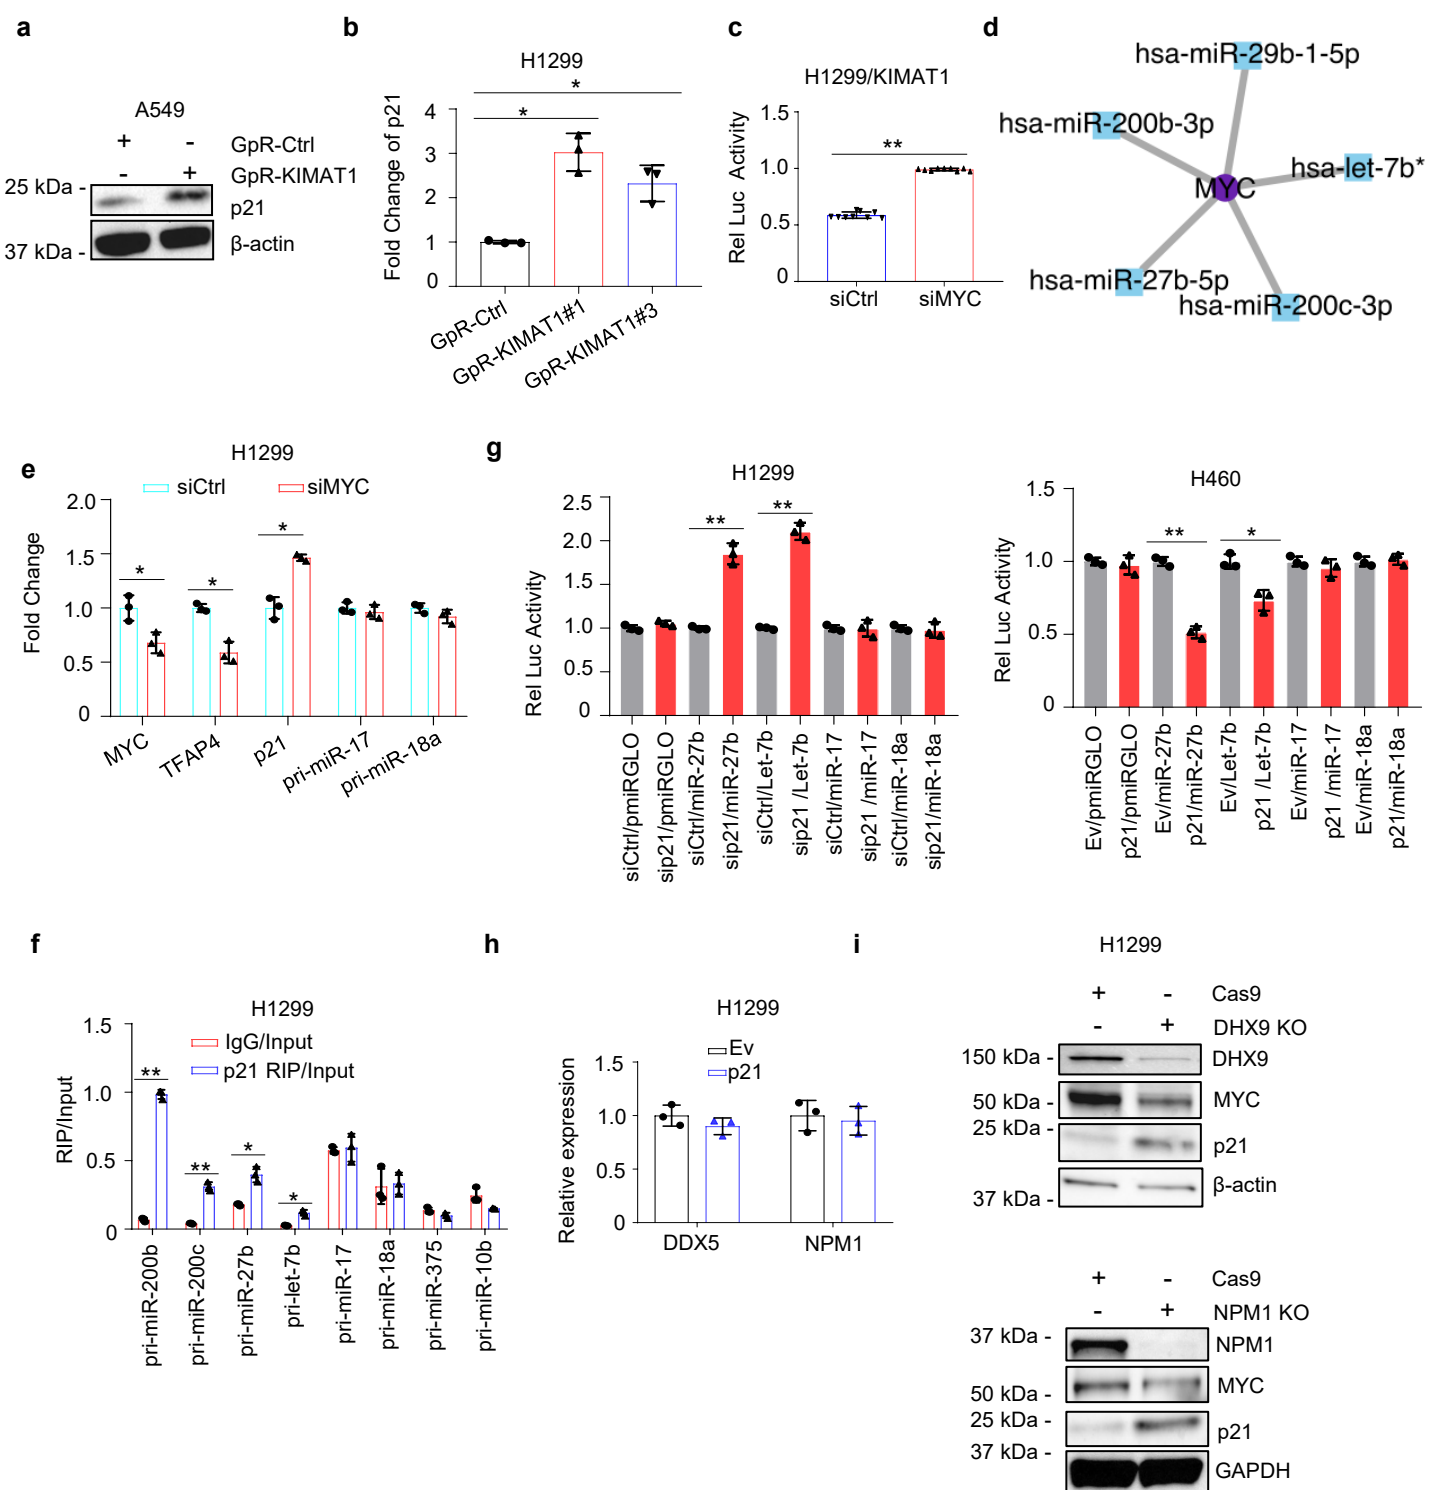

**Supplementary Figure 12: p21 binds and promotes the processing of tumor suppressive miRNAs.** **a,b**, p21 protein and mRNA induction upon *KIMAT1* KD. *p* values =0.0012 (*KIMAT1*#1 vs Ctrl) and 0.005 (*KIMAT1*#3 vs Ctrl). *n*=2. **c**, Luciferase reporter assay of p21 promoter activity upon MYC silencing in H1299/*KIMAT1* stable cell lines. *n*=9, \*\*= 1.68E-17. **d**, Network depicting *KIMAT1* repressed miRNAs targeting MYC using Targetscan and Diana-TarBase algorithms. **e**, MYC silencing does not affect *pri-miR-17* and *pri-miR-18a*. TFAP4 and p21 were used as positive controls. *p* values =0.022, 0.003 and 0.002 from left to right. **f**, p21 binds to TS and not to TP miRNAs by CLIP. *p* values= 1.63E-06, 0.0001, 0.003 and 0.002 from left to right. **g**, *In vivo* cellular monitoring assay in H1299 and H460 cell lines transfected with a luciferase vector carrying a segment of *pri-miR-27b*, *pri-let-7b*, *pri-miR-17* or *pri-miR-18a* between the luciferase gene and polyadenylation signal. *p* values= 0.00027 and 4.11E-05 (Left); 8.4E-05 and 0.006 (Right) from left to right. **h**, p21 enforced expression does not affect *DDX5* and *NPM1* mRNA. *p* values=0.24 and 0.69. **i**, Immunoblotting with the indicated antibodies in DHX9 and *NPM1* KO cells. *n*=2 Error bars represent mean  $\pm$  S.D (*n*=3), *p* values were calculated by a two-tailed Student's *t* test.



**Supplementary Figure 13: p21 is downregulated in LUAD and LUSC and its overexpression induces cell death.** **a**, p21 is downregulated in the LUAD and LUSC datasets (TCGA) compared to normal lung samples. *p* value was calculated by a two-tailed Student's *t* test. **b**, Colony formation assay and corresponding quantification in A549 (\*=0.03) and H1299 (\*\*=0.0004) cells upon p21 silencing. **c,d**, qRT-PCR of pro-apoptotic genes upon *KIMAT1* silencing (c) or p21 OE (d) in p53 null or p53 wild-type cells. BMF, Bcl2 modifying factor; DAP, death-associated protein 1. *p* values= 0.004, 0.0002, 0.001, 9.97E-05 and 0.004 (C); 0.0006, 0.005, 0.005, 0.002 and 0.001 (d, Left); 4.51E-05, 0.00097, 0.0001, 1.41E-05 and 4.51E-05 (d, Right) from left to right. **e**, Treatment of H1299 and A549 cells with actinomycin D (Act D) does not suppress p21-mediated apoptosis. *p* values = 1.94E-06 and 3.47E-06 (Left); 8.15E-05 and 0.00024 (Right) from left to right. **b-e**, Error bars represent mean  $\pm$  S.D (n=3), *p* values were calculated by a two-tailed Student's *t* test.



**a**

| PDX                            | IC11LC13                                     |
|--------------------------------|----------------------------------------------|
| <b>Biopsy origin</b>           | Lung squamous cell carcinoma (primary tumor) |
| <b>Treatment before biopsy</b> | no chemotherapy                              |
| <b>KRAS status</b>             | WT amplification (six copies)                |
| <b>NRAS</b>                    | WT                                           |
| <b>P53 status</b>              | E162fs mutation (homozygous)                 |

**b**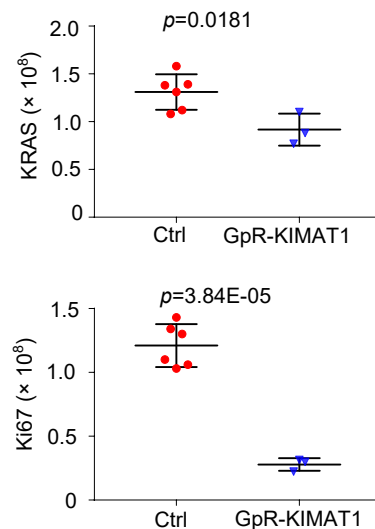**c**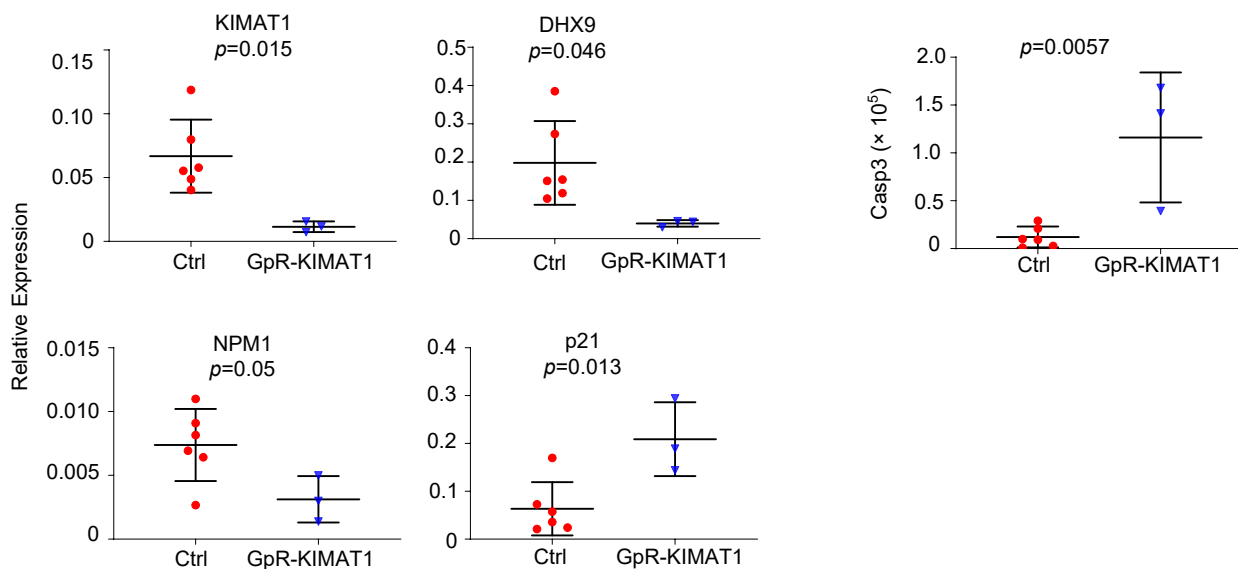

### Supplementary Figure 14: *KIMAT1* KD reduces tumor growth in a PDX mouse model. **a**, Table

indicates the mutational status of the PDX used in the study. **b**, Quantification of KRAS, Ki67 and

cleaved caspase 3 in mice treated with *KIMAT1* GpRs compared to control mice by IHC analysis. **c**,

qPCR for *KIMAT1*, DHX9, NPM1 and p21 in tumors derived from the PDX mouse model reported in a.

Ctrl n=6 *KIMAT1* KD n=3. Error bars represent mean  $\pm$  S.D, p values were calculated by two-tailed

Student's *t* test.

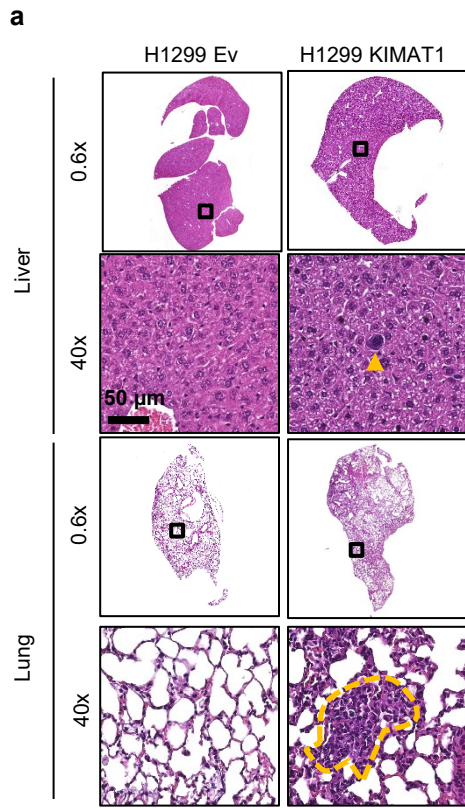

|       | Ev     | KIMAT1 |
|-------|--------|--------|
| Lung  | 14.30% | 66.70% |
| Liver | 28.60% | 100%   |

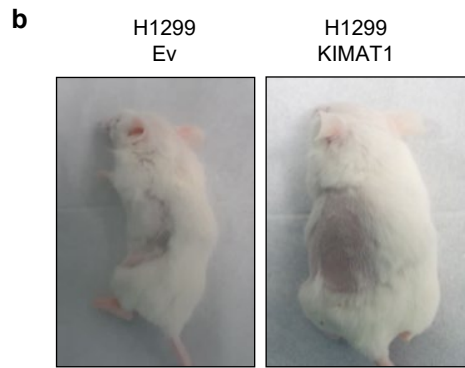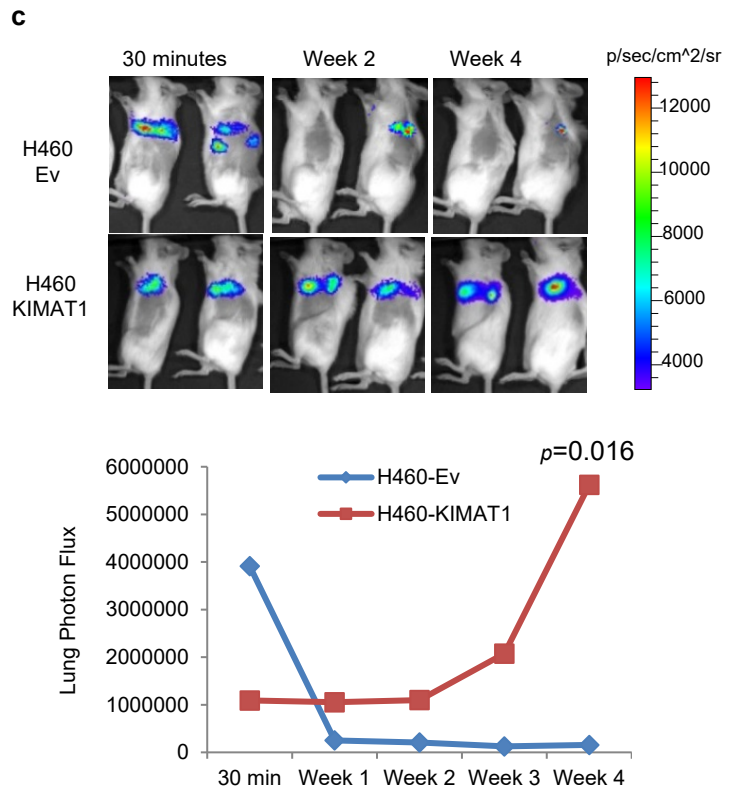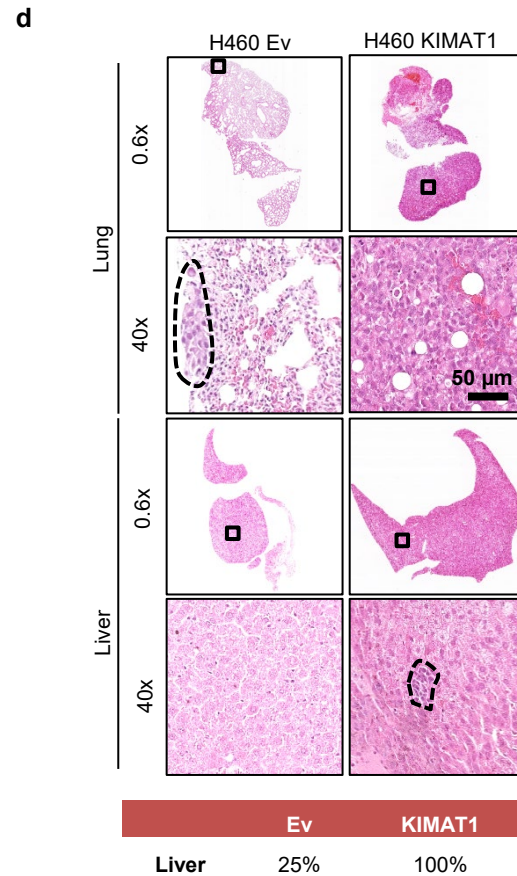

**Supplementary Figure 15: *KIMAT1* overexpression promotes distant metastases *in vivo*.** **a**, Representative lung and liver sections from NSG mice injected i.v. with cells stably overexpressing *KIMAT1* or an empty vector. A single isolated tumor cell (arrow's head) and a small neoplastic lesion are shown in the liver and lungs of a H1299/*KIMAT1* mouse, respectively. Scale bar, 50  $\mu\text{m}$ . The table reports the percentage of mice from the two groups with neoplastic lesions in the lungs and liver metastases. **b**, Representative images of mice orthotopically implanted with H1299/*luc*+/*KIMAT1* stable cells with malignant ascites before sacrifice. a,b, n=7. **c**, Bioluminescent signals (top) and quantification (bottom) of lung tumors derived from mice injected with H460/*luc*2+/*KIMAT1* cells relative to control mice. Error bars represent mean  $\pm$  S.D (n=8). Two-tailed Student's *t* test was used to measure statistical significance. **d**, Representative H&E images of lungs and liver for the mice in c. Mice injected with H460/*luc*+/*KIMAT1* stable cell lines present a large neoplastic area in the lungs (upper panels) and a small metastatic locus (dashed lines) in the liver. A small lesion (dashed lines) is observed in the lungs of control mice, no metastases or micrometastases are evident in the liver. Scale bar, 50  $\mu\text{m}$  The table underneath the panels report the percentage of mice from the two groups with liver micrometastases. n=8.

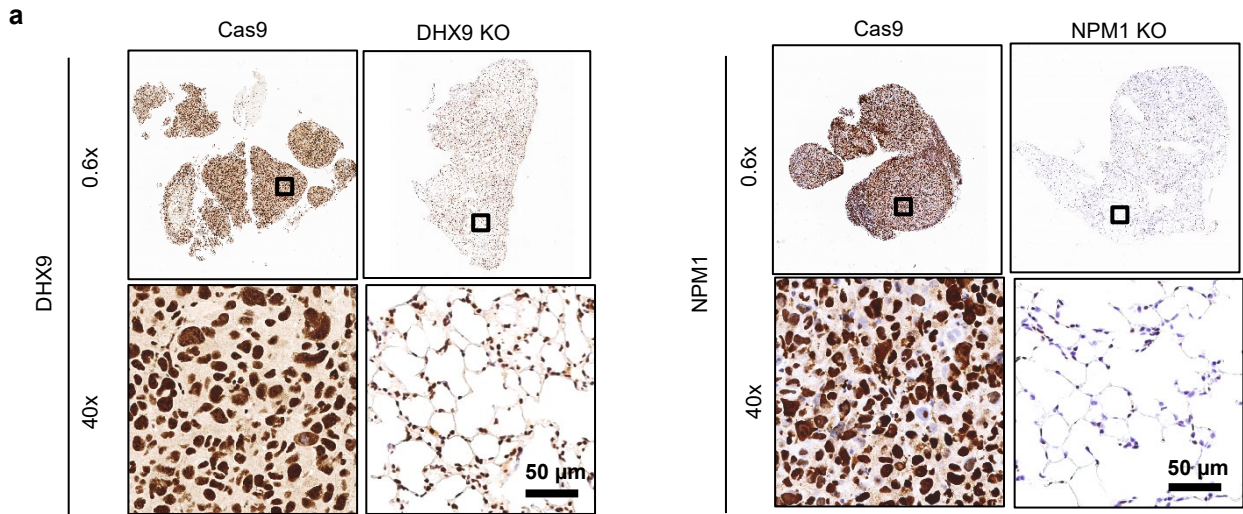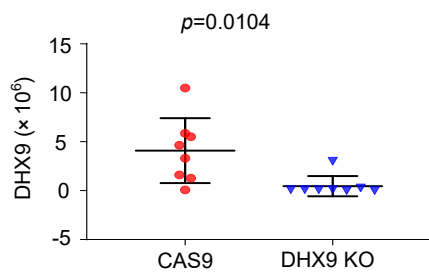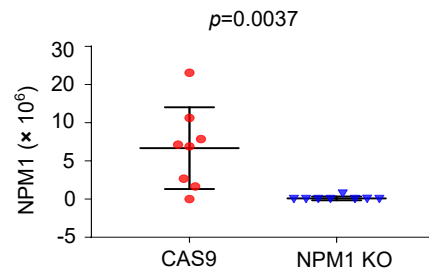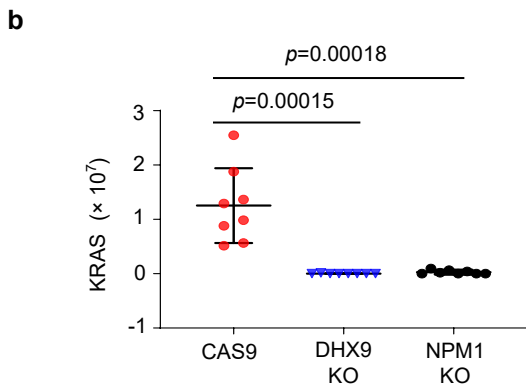

**c**

|       | Cas9  | DHX9 KO | NPM1 KO |
|-------|-------|---------|---------|
| Lung  | 87.5% | 37.5%   | 0%      |
| Liver | 50%   | 12.5%   | 25%     |

**Supplementary Figure 16: DHX9 KO and NPM1 KO abrogate distant metastases in vivo.** **a**, Representative IHC (top) and corresponding quantification (bottom) of DHX9 and NPM1 expression in lungs of mice orthotopically injected with DHX9 KO, NPM1 KO or control cells (Cas9). **b**, Relative expression of KRAS in lungs of mice orthotopically injected with DHX9 KO or NPM1 KO cells. **c**, Table reporting the percentage of micrometastatic loci in mice orthotopically injected with DHX9 KO, NPM1 KO or control cells (Cas9). Error bars represent mean  $\pm$  S.D. ( $n=8$ ),  $p$  values were calculated by a two-tailed Student's  $t$  test.

**a**

| Mice                | Distended abdomens/<br>Ascites |
|---------------------|--------------------------------|
| Ev+Cas9             | 2/8                            |
| KIMAT1 OE + Cas9    | 6/8                            |
| KIMAT1 OE + DHX9 KO | 3/8                            |
| KIMAT1 OE + NPM1 KO | 2/8                            |

**c**

|                     | lung   | liver  |
|---------------------|--------|--------|
| Ev + Cas9           | 44.88% | 6.68%  |
| KIMAT1 OE + Cas9    | 72.63% | 56.88% |
| KIMAT1 OE + DHX9 KO | 42.63% | 36%    |
| KIMAT1 OE + NPM1 KO | 41.25% | 20.75% |

**b**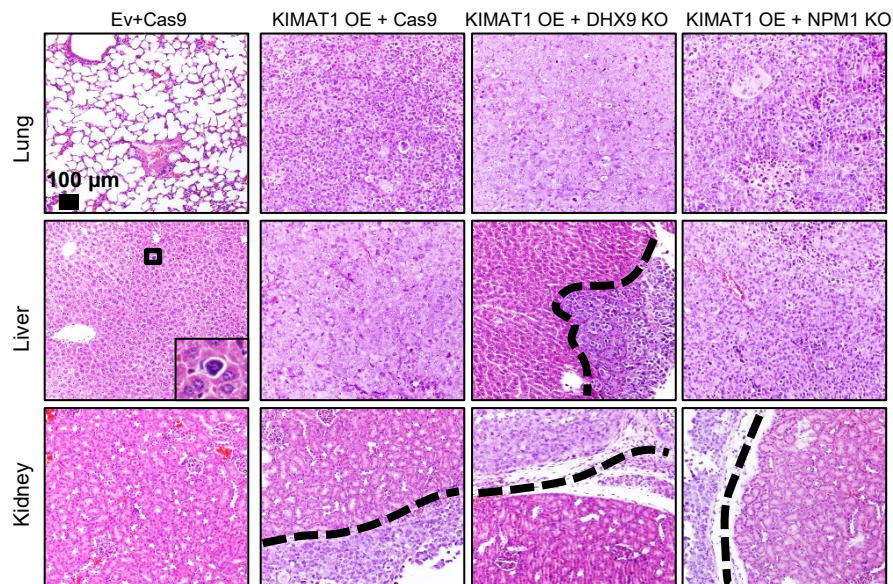**d**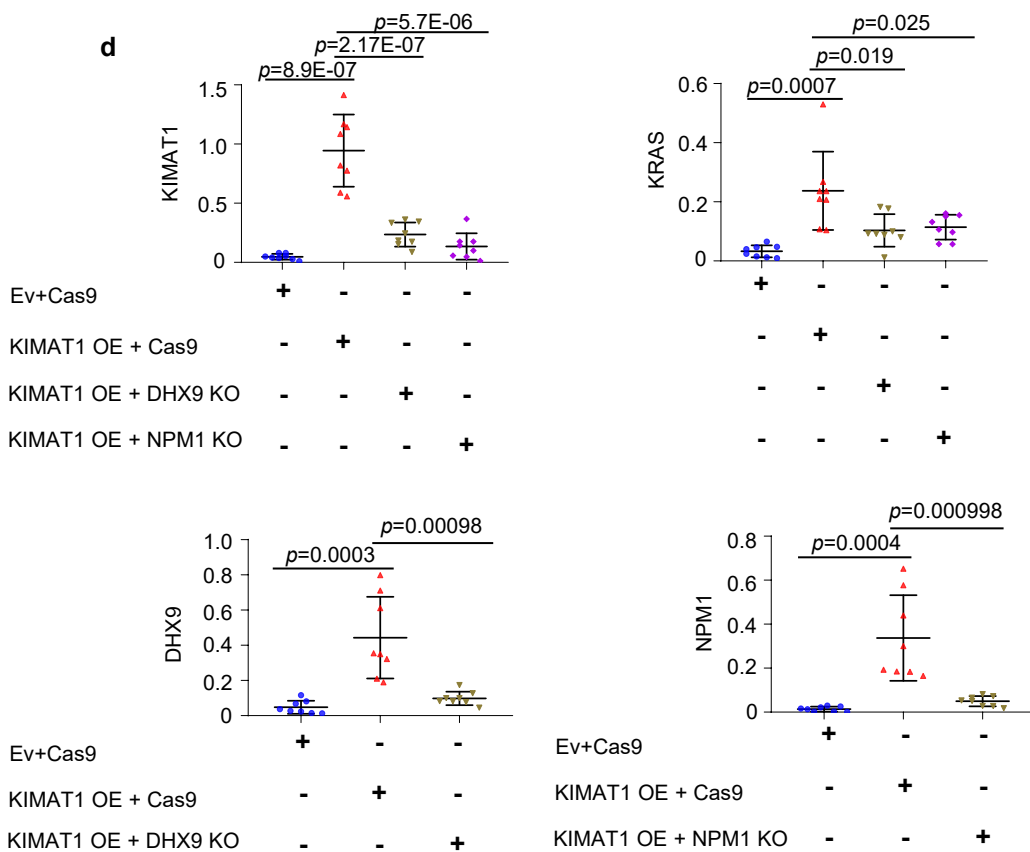

**Supplementary Figure 17: DHX9 KO or NPM1 KO halted *KIMAT1*-mediated distant metastases.**

**a**, Clinical symptoms in mice injected orthotopically with the indicated cell lines. **b**, Representative H&E images of lungs, liver and kidney for the four groups of mice injected with the indicated cells. Mice injected with *KIMAT1* OE+Cas9 stable cells presented a large neoplastic area in the lungs and metastatic involvement in the liver and in the perirenal fat. Mice injected with Ev+Cas9 stable cell lines showed a lower metastatic rate. Note the single tumor cell highlighted (inset) in the liver of a mouse injected with Ev+Cas9 cells (Original magnification 10x; scale bar, 50  $\mu$ m). **c**, The table reports the rate of mice showing neoplastic area in the lungs and metastasis in the liver from the four groups. **d**, qPCR analysis for the indicated genes in tumor derived from a. Error bars represent mean  $\pm$  S.D (n=8), \*\**p* value < 0.001, \**p* value < 0.05 by a two-tailed Student's *t* test.

**Supplementary Table 1. siRNAs and GapmeRs**

| <b>siRNA</b>                          | <b>Source</b>           | <b>Catalog number</b> | <b>Assay ID</b> |
|---------------------------------------|-------------------------|-----------------------|-----------------|
| siDHX9                                | ThermoFisher Scientific | 4390824               | s4020           |
| siKRAS                                | ThermoFisher Scientific | 4390824               | s7938           |
| siRNA Negative Control                | ThermoFisher Scientific | 4390843               | N/A             |
| SMARTpool: ON-TARGETplus NPM1 siRNA   | Dharmacon               | L-015737-00-0005      | N/A             |
| SMARTpool: ON-TARGETplus CDKN1A siRNA | Dharmacon               | L-003471-00-0005      | N/A             |
| SMARTpool: ON-TARGETplus MYC siRNA    | Dharmacon               | L-003282-02-0005      | N/A             |
| SMARTpool: ON-TARGETplus EGFR siRNA   | Dharmacon               | L-003114-00-0005      | N/A             |
| ON-TARGETplus Non-targeting Pool      | Dharmacon               | D-001810-10-05        | N/A             |

| <b>lncRNA</b>    | <b>Source</b> | <b>Sequence</b>  |
|------------------|---------------|------------------|
| Negative Control | QIAGEN        | AACACGTCTATACGC  |
| GapmeR KIMAT1#1  | QIAGEN        | AACGAGTGCAAAGTGT |
| GapmeR KIMAT1#2  | QIAGEN        | TCTGTGGTGTGCTCTT |
| GapmeR KIMAT1#3  | QIAGEN        | CTGTCCACTTGGAGTT |

**Supplementary Table 2. lncRNA FISH and RAP-MS probes**

**KIMAT1 FISH probes**

| <b>Probe ID</b> | <b>Sequence</b>    | <b>Modification</b> |
|-----------------|--------------------|---------------------|
| KIMAT1 FISH_1   | CTGATGCGTTCCTCTCAG | CAL Fluor Red 590   |
| KIMAT1 FISH_2   | CAGCCGCTTGTTTTCTTC | CAL Fluor Red 590   |
| KIMAT1 FISH_3   | CTTGACGTCCTCTCCACG | CAL Fluor Red 590   |
| KIMAT1 FISH_4   | GTCTGTGGTGTGCTCTTC | CAL Fluor Red 590   |
| KIMAT1 FISH_5   | AAACTCCGCCTGGTCCTG | CAL Fluor Red 590   |
| KIMAT1 FISH_6   | CTTAGTGGCCTAGCTCTC | CAL Fluor Red 590   |
| KIMAT1 FISH_7   | GGTTTATCTCCTGGAGTT | CAL Fluor Red 590   |
| KIMAT1 FISH_8   | CGACGGAGGAGCCACAAG | CAL Fluor Red 590   |
| KIMAT1 FISH_9   | GGGGCTTGGAGAACGAGT | CAL Fluor Red 590   |
| KIMAT1 FISH_10  | CCTGGGTGTACCAGAAGA | CAL Fluor Red 590   |
| KIMAT1 FISH_11  | TGTGGAAAGGACCGAGGC | CAL Fluor Red 590   |
| KIMAT1 FISH_12  | CCAGGTCAATGAGTACCT | CAL Fluor Red 590   |
| KIMAT1 FISH_13  | AGGGTGCCCTTAGTTTTG | CAL Fluor Red 590   |
| KIMAT1 FISH_14  | ACAGCTGAAGCCTGTGTT | CAL Fluor Red 590   |
| KIMAT1 FISH_15  | AGTGCCCAGGGGTGAATG | CAL Fluor Red 590   |
| KIMAT1 FISH_16  | ATACACTCAGGCAGGCTC | CAL Fluor Red 590   |
| KIMAT1 FISH_17  | CGCAGTGTGCGATGGGAG | CAL Fluor Red 590   |
| KIMAT1 FISH_18  | GATGAGGCCCCAGTTAAA | CAL Fluor Red 590   |
| KIMAT1 FISH_19  | CAGACATTCACCTTCCGA | CAL Fluor Red 590   |
| KIMAT1 FISH_20  | CAGGTGGTAGGGTTTTCG | CAL Fluor Red 590   |
| KIMAT1 FISH_21  | CCTAGCAAAGGGGAGTCA | CAL Fluor Red 590   |
| KIMAT1 FISH_22  | AACGGCAGTCAAATTCCT | CAL Fluor Red 590   |
| KIMAT1 FISH_23  | GGGGCCGTTGTTTTTGAG | CAL Fluor Red 590   |
| KIMAT1 FISH_24  | ATGACCTGTCTTAGCTGC | CAL Fluor Red 590   |
| KIMAT1 FISH_25  | CCCTCTCTGAAAACGTAC | CAL Fluor Red 590   |
| KIMAT1 FISH_26  | CCGCACTCCTGTATCATT | CAL Fluor Red 590   |
| KIMAT1 FISH_27  | GAGATGACACTCTTCCCT | CAL Fluor Red 590   |

**KIMAT1 RAP-MS probes**

| <b>Probe ID</b>        | <b>Sequence</b>      | <b>Modification</b> |
|------------------------|----------------------|---------------------|
| KIMAT1 Antisense probe | CTTGTTTTCTTCCACTGATG | Biotin              |
| KIMAT1 Antisense probe | AAGGGAGATGGTTTATCTCC | Biotin              |
| KIMAT1 Antisense probe | GGTCAATGAGTACCTCAAGT | Biotin              |
| KIMAT1 Antisense probe | GGTTTTCGAAGGCAGACATT | Biotin              |
| KIMAT1 Antisense probe | ATGGACGATGACCTGTCTTA | Biotin              |
| KIMAT1 Antisense probe | AAAGAGATGACACTCTTCCC | Biotin              |
| UBC Antisense probe 1  | TCCATTCAAGACTCGGGAAC | Biotin              |
| UBC Antisense probe 2  | GATGGTCTTACCAGTCAGAG | Biotin              |
| UBC Antisense probe 3  | AGCTGTTTTCCAGCAAAGAT | Biotin              |
| UBC Antisense probe 4  | CTTCACGAAGATTTGCATCC | Biotin              |



### Supplementary Table 3. List of Primers used in this study

#### lncRNA cloning in pCDH vector

KIMAT1 Fwd ATA TCTAGA GCCACC ATG TGCTGGATGCTGAGAGG  
KIMAT1 Rev CGC GGATCC CTCCCTTCTGTATCATTTAAAGAG

#### lncRNA deletion constructs cloning for *in vitro* transcription

KIMAT1  
Deletion construct 1-4 Fwd TAA TAC GAC TCA CTA TAG GG TGCTGGATGCTGAG  
Deletion construct 1 Rev GCGTCTGTAGGCAGCTTGTGTTAACAG  
Deletion construct 2 Rev CCACAAGAAAGACAGGTGGTAGGGTTTTTCG  
Deletion construct 3 Rev CCGCTGACAGGGGGCGTTGTTTTTGGAG  
Deletion construct 4 Rev CTCCCTTCTGTATCATTTAAAGAGATGACACTC  
  
Deletion construct 5 Fwd TAA TAC GAC TCA CTA TAG GG CTCCCTTCTGTATCA  
Deletion construct 5 Rev TGC TGG ATG CTG AGA GGA ACG CAT CAG T  
  
Deletion construct 6 Fwd TAA TAC GAC TCA CTA TAG GG GATAAACCATCTCCC  
Deletion construct 7 Fwd TAA TAC GAC TCA CTA TAG GG ACAAGCTGCCTACA  
Deletion construct 8 Fwd TAA TAC GAC TCA CTA TAG GG AACCATCAAACCTCC  
Deletion construct 6-8 Rev CTCCCTTCTGTATCATTTAAAGAGATGACACTC

#### lncRNA deletion constructs cloning in pCDH vector

pCDH KIMAT1  $\Delta$ 7 Fwd ATA TCTAGA GCCACC ATG ACAAGCTGCCTACA  
pCDH KIMAT1  $\Delta$ 7 Rev CGC GGATCC CTCCCTTCTGTATCATTTAAAGAG  
  
pCDH KIMAT1  $\Delta$ 1 Fwd ATA TCTAGA GCCACC ATG TGCTGGATGCTGAGAGG  
pCDH KIMAT1  $\Delta$ 1 Rev CGC GGATCC GCGTCTGTAGGCAGCTTGTGTTAA  
  
KIMAT1 mut Fwd1 TGCTTCCACTCAATACTCGTTCTCCAAGCCCCCGTGT  
KIMAT1 mut Rev1 ACACGGGGGCTTGGAGAACGAGTATTGAGTGGAAGCA  
KIMAT1 mut Fwd2 CTTGTGGAACCATCAGGACAGGCAACTGGAGCCTCAG  
KIMAT1 mut Rev2 CTGAGGCTCCAGTTGCCTGTCTGATGGTTCCACAAG

#### pri-miRNA *in vitro* processing primers

pri-miR-27b Fwd TAA TAC GAC TCA CTA TAG GG GAGAACAGGTGCATC  
pri-miR-27b Rev AAGTGGTCTCTCATCCTCCAGGATCGCG

#### sgRNA primers

DHX9 sgRNA Fwd-1 CACC GTTCTCTGTTGTCTCGGTAG  
DHX9 sgRNA Rev-1 AAAC CTACCGAGACAACAGAGAAc  
DHX9 sgRNA Fwd-2 CACC GTCACACACGGTCCTAAGAG  
DHX9 sgRNA Rev-2 AAAC CTCTTAGGACCGTGTGTGAc  
  
NPM1 sgRNA Fwd-1 CACC GCGCAGGACGGCTACGGTAC  
NPM1 sgRNA Rev-1 AAAC GTACCGTAGCCGTCCTGCGC

#### KIMAT1 promoter cloning in pGL3 basic vector

pGL3 basic NP Fwd ACT GGTACC AGGTCTCCTGAGAGCTCACT  
pGL3 basic NP Rev CAG CTCGAG TACTACTATCACTATCAGGCTAAGC  
  
pGL3 basic KIMAT1 MER101-1 Fwd ACT GGTACC AAAAGGTCTCTGAAAAGGAATTTGG  
pGL3 basic KIMAT1 MER101-1 Rev TAT CTCGAG CCCCCACCACTGTTTAAAA

pGL3 basic KIMAT1 MER101-2 Fwd      ACT GGTACC TCTGGCTACAGTTTATCTTGG  
pGL3 basic KIMAT1 MER101-2 Rev      TAT CTCGAG TGGTAACTATGCCCTGGCT

pGL3 basic KIMAT1 MER101-1 BS1 Del F CCTGGGGTCCCCATTAGGTGCAAATGAAGGATTGAAACGT  
pGL3 basic KIMAT1 MER101-1 BS1 Del R ACGTTTCAATCCTTCATTTGCACCTAATGGGGACCCAGG  
pGL3 basic KIMAT1 MER101-1 BS2 Del F GCAAATGAAGGATTGGCTTAGTTCTGATTGGTTGG  
pGL3 basic KIMAT1 MER101-1 BS2 Del R CCAACCAATCAGAATAAGCCAATCCTTCATTTGC

#### **pri-miRNA cloning in pmiRGLO vector**

pri-miR-200c Fwd:      TAG CTCGAG TTAAGGCAGTGGGGGGGCAG  
pri-miR-200c Rev      CAG TCTAGA CTTGGGTCAGGCAGCTTCAG  
pri-miR-27b Fwd      TAG CTCGAG ACCTCCTGACTTGAGAGTCC  
pri-miR-27b Rev      CAG TCTAGA CATCGCTGGGCATAAATAAAGGG  
pri-let-7b Fwd      TAA CTCGAG AGCCGCACTGAGAGAGGCGATC  
pri-let-7b Rev      TAA TCTAGA CCAGGCCCGGCCTTGCACTGC  
pri-miR-17 Fwd      GCC CTCGAG GTTGGGTGATAAAGTAGATATAACCTGAG  
pri-miR-17 Rev      CGC TCTAGA TGGTCACAATCTTCAGTTTTACAAGGTG  
pri-miR-18a Fwd      GCC CTCGAG ACAAGTATTTGCTAAGTGAAGC  
pri-miR-18a Rev      AGA TCTAGA AAAAGCACTCAACATCAGCAGGCC

#### **Gene cloning in FLAG-HA-pcDNA 3.1**

DHX9 Fwd      CGC GGATCC ATGGGTGACGTTAAAAATTTTCTG  
DHX9 Rev      TAC GGTACC TTAATAGCCGCCACCTCCTC  
DHX9 dsRBDs Del Fwd      AAGAAGGAAGGAGAGACAGTGG  
DHX9 dsRBDs Del Rev      CACTAGTCCAGTGTGGTGGAA

NPM1 DRBD Del Fwd      GGATCCACCGGATCTAGATAACT  
NPM1 DRBD Del Rev      AGAACCACCTTTTTCTATACTTGCTTG

#### **KIMAT1 RACE**

5'RACE  
KIMAT1 GSP1      CCGCTGACAGGGGGCGTTGTTTTTGGAG  
KIMAT1 GSP2      ATA CTCGAG CCACAAGAAAGACAGGTG

3'RACE  
KIMAT1 GSP3      ATA GGTACC GATAAACCATCTCCCTTG

#### Supplementary Table 4. qPCR primers and probes

##### qPCR primer

|                          |                             |
|--------------------------|-----------------------------|
| KIMAT1 Fwd               | AAAACAACGCCCCCTGTC          |
| KIMAT1 Rev               | TCCCCTCTCTGAAAACGTACA       |
| CCDST Fwd                | GCTGCAGTTCCTGATACTGGT       |
| CCDST Rev                | AAATAGTGTTCCTCAGGGATCAAAGA  |
| SAMD12-AS1 Fwd           | TGGCACCTCTTTACACTGGTT       |
| SAMD12-AS1 Rev           | AGGCATCTCACTTGGTGCTC        |
| Human $\beta$ -actin Fwd | TGACATTAAGGAGAAGCTGTGCTAC   |
| Human $\beta$ -actin Rev | GAGTTGAAGGTAGTTTCGTGGATG    |
| Mouse $\beta$ -actin Fwd | TTC ACC ACC ACA GCT GAG AG  |
| Mouse $\beta$ -actin Rev | ATA GTG ATG ACC TGG CCG TC  |
| UBC Fwd                  | TAAGGAAGGCATCCCTCCTGAC      |
| UBC Rev                  | TTCACGAAGATTTGCATCCCAC      |
| DHX9 Fwd                 | GCAGAAATGACCATTTATATCAAGC   |
| DHX9 Rev                 | TCCATGTTCTCGTGCAAAAA        |
| NPM1 Fwd                 | CCGGATGACTGACCAAGAG         |
| NPM1 Rev                 | TTACAGAAATGAAATAAGACGGAAAA  |
| CDKN1A Fwd               | TCACTGTCTTGTACCCTTGTGC      |
| CDKN1A Rev               | GGCGTTTGGAGTGGTAGAAA        |
| MYC Fwd                  | CACCAGCAGCGACTCTGA          |
| MYC Rev                  | GATCCAGACTCTGACCTTTTGC      |
| TFAP4 Fwd                | GCAGGCAATCCAGCACAT          |
| TFAP4 Rev                | GGAGGCGGTGTCAGAGGT          |
| RAPGEF4 Fwd              | CGAGCAGAAGGACTTCAAGG        |
| RAPGEF4 Rev              | AGAGCCCGTTTCCATAACAC        |
| MAP7 Fwd                 | GACTCCTGACGCCACAC           |
| MAP7 Rev                 | AACGAGGACAAATGGGGATA        |
| CCND2 Fwd                | GCTGTGCATTTACACCGACA        |
| CCND2 Rev                | AGCTGCCAGGTTCCACTTC         |
| RELN Fwd                 | TCATGTTGATGTGTCCGTGA        |
| RELN Rev                 | TTTGTGCTTAAATTTTCATTTTTCTGT |
| KRAS Fwd                 | TTGTGGACGAATATGATCCAAC      |
| KRAS Rev                 | TCCCTCATTGCACTGTACTION      |
| DIABLO Fwd               | TGACTGCAGTTGGTCTTTTCAG      |
| DIABLO Rev               | GCGGTTATAGAGGCCTGATCT       |
| BCL2L11 Fwd              | CAGGCCTTCAACCACTATCTC       |
| BCL2L11 Rev              | AACTCTTGGGCGATCCATATC       |
| BMF Fwd                  | ACTTCAGCTCTTCCCTCTCA        |
| BMF Rev                  | GAGTCTGGGTAGCTTTGTCTT       |
| DAP Fwd                  | CCCGAAGGGAAACTAGAGACT       |
| DAP Rev                  | GTCTCCTGTATGTGGGTGTTT       |
| pri-miR-200a Fwd         | GGATTAGGACGCTCAGGTGT        |
| pri-miR-200a Rev         | AGCCCTCTGTTGGGTCCT          |
| pri-miR-200b Fwd         | GCGATGCTGTCCCTCAGTG         |
| pri-miR-200b Rev         | CTCGCTGGGAAGCTCAGTAG        |
| pri-miR-200c Fwd         | GGCTCACCAGGAAGTGTCC         |
| pri-miR-200c Rev         | AGGATCCCTGCGGAAAAG          |
| pri-miR-7 Fwd            | TGCCTTAATTTTTCTTCTGCTTTC    |
| pri-miR-7 Rev            | AATGAGAAGTTTGCTTGGTTAAGG    |
| pri-miR-27a Fwd          | CATGGGCCCTCTAGGTATCTC       |
| pri-miR-27a Rev          | GGAGCTGGAGCTAGCTGT          |
| pri-miR-27b Fwd          | ATTACCACGCAACCACGAC         |
| pri-miR-27b Rev          | GCACCTGTTCTCCAATCTGC        |
| pri-miR-139 Fwd          | TAGAAGCTGGGACTGGCTTG        |
| pri-miR-139 Rev          | CCCACACTGTTGGCTCCT          |
| pri-let-7b Fwd           | GCATACACTGGGTCCCACAT        |
| pri-let-7b Rev           | GCCTCAGTTTTCCCAGGTA         |
| pri-miR-17 Fwd           | CGTGTCTAAATGGACCTCATATCTT   |
| pri-miR-17 Rev           | AAACCATACAAATTCAGCATAATCC   |

pri-miR-18a Fwd TTCAACAAGTATTTGCTAAGTGGAAG  
 pri-miR-18a Rev GGCAATTTAGTCCATGTGTACCT  
 pri-miR-375 Fwd CTCTGCTTCTCGGCTCCTC  
 pri-miR-375 Rev CCTCTGGAACAACACCAGATG  
 pri-miR-10b Fwd TGTTGCGCTGCTTGGTAAC  
 pri-miR-10b Rev GCGACAATTTGAAGCAATGA

pre-miR-200a Fwd GCATCTTACCGGACAGTGCT  
 pre-miR-200a Rev GGGTCACCTTTGAACATCGT  
 pre-miR-200b Fwd CCGTGGCCATCTTACTGG  
 pre-miR-200b Rev TCCGCCGTCATCATTACC  
 pre-miR-200c Fwd CCCTCGTCTTACCCAGCAGTG  
 pre-miR-200c Rev CCTCCATCATTACCCGGCAG  
 pre-miR-7 Fwd GGATGTTGGCCTAGTTCTGTGTGG  
 pre-miR-7 Rev GCCTGTGCCATATGGCAGACTG  
 pre-miR-27a Fwd CTGAGGAGCAGGGCTTAGCT  
 pre-miR-27a Rev GGCGGAACTTAGCCACTGTGAA  
 pre-miR-27b Fwd CTAACAAGGTGCAGAGCTTAGC  
 pre-miR-27b Rev CTTCAGGTGCAGAACTTAGCC  
 pre-miR-139 Fwd GTGTATTCTACAGTGCACGTGTC  
 pre-miR-139 Rev TACTCCAACAGGGCCGCGTC  
 pre-let-7b Fwd CGGGGTGAGGTAGTAGGTTG  
 pre-let-7b Rev CAGGGAAGGCAGTAGGTTGTAT  
 pre-miR-17 Fwd GTCAAAGTGCTTACAGTGCAGG  
 pre-miR-17 Rev GTCACCATAATGCTACAAGTGCC  
 pre-miR-18a Fwd GGTGCATCTAGTGCAGATAGTG  
 pre-miR-18a Rev TGCCAGAAGGAGCACTTAGGGC  
 pre-miR-375 Fwd ACGAGCCCCTCGCACAAC  
 pre-miR-375 Rev TCACGCGAGCCGAACGAAC  
 pre-miR-10b Fwd CCAGAGGTTGTAACGTTGTCT  
 pre-miR-10b Rev GCATCGACCATATATTCCCCTA

**mature miRNA qPCR probe**

| Probe       | SOURCE       | Catalog number | Assay ID   |
|-------------|--------------|----------------|------------|
| miR-200a-3p | ThermoFisher | 4427975        | 000 502    |
| miR-200b-3p | ThermoFisher | 4427975        | 002 251    |
| miR-200c-3p | ThermoFisher | 4427975        | 002 300    |
| miR-7-5p    | ThermoFisher | 4440886        | 005723-mat |
| miR-27a-3p  | ThermoFisher | 4427975        | 000 408    |
| miR-27b-5p  | ThermoFisher | 4427975        | 000 409    |
| miR-139-5p  | ThermoFisher | 4427975        | 005364_mat |
| let-7b-3p   | ThermoFisher | 4427975        | 002 404    |
| miR-17-5p   | ThermoFisher | 4427975        | 002 308    |
| miR-18a-5p  | ThermoFisher | 4427975        | 002 422    |
| miR-375     | ThermoFisher | 4427975        | 000 564    |
| miR-10b-5p  | ThermoFisher | 4427975        | 002 218    |
| RNU48       | ThermoFisher | 4427975        | 001 006    |
| SNOR234     | ThermoFisher | 4427975        | 001 234    |

**Chip-qPCR primer**

KIMAT1 Chip Fwd GAAGAAACATCTCTGGGCTG  
 KIMAT1 Chip Rev TGCTGCTTCTCACTCTGAC  
 TFAP4-MYC Chip Fwd CGTGCGGCCAGCTAAGCAAGG  
 TFAP4-MYC Chip Rev CATTGCAGCTGCACGGAGCGG

**Supplementary Table 5. List of antibodies used in this study****Western blot**

| <b>Antibodies</b> | <b>Source</b>             | <b>Cat number</b> | <b>Dilution</b> |
|-------------------|---------------------------|-------------------|-----------------|
| RAS               | Cell Signaling Technology | 8955              | 1:1000          |
| DHX9              | BETHYL Laboratories       | A300-855A         | 1:1000          |
| NPM1              | Abcam                     | Ab10530           | 1:1000          |
| MYC               | Abcam                     | ab32072           | 1:1000          |
| β-actin           | Santa Cruz Biotechnology  | sc-47778          | 1:1000          |
| α-tubulin         | Cell Signaling Technology | 2125              | 1:1000          |
| GAPDH             | Cell Signaling Technology | 2118              | 1:1000          |
| pERKs             | Cell Signaling Technology | 9101              | 1:1000          |
| Total ERKs        | Abcam                     | ab184669          | 1:1000          |
| pAKT              | Cell Signaling Technology | 4060              | 1:1000          |
| Total AKT         | Cell Signaling Technology | 9272              | 1:1000          |
| c-RAF             | Santa Cruz Biotechnology  | sc-227            | 1:1000          |
| p21               | Abcam                     | ab109520          | 1:1000          |
| Ubiquitin         | Proteintech               | 10201-2-AP        | 1:1000          |
| Drosha            | Abcam                     | ab183732          | 1:1000          |
| DDX5              | Abcam                     | ab128928          | 1:1000          |

**Immunoprecipitation**

| <b>Antibodies</b> | <b>Source</b>             | <b>Cat number</b> | <b>Dilution</b> |
|-------------------|---------------------------|-------------------|-----------------|
| DHX9              | BETHYL Laboratories       | A300-855A         | 2 µg per IP     |
| NPM1              | Abcam                     | Ab10530           | 2 µg per IP     |
| p21               | Abcam                     | ab109520          | 2 µg per IP     |
| Drosha            | Abcam                     | ab183732          | 2 µg per IP     |
| IgG               | Cell Signaling Technology | 2729s             | 2 µg per IP     |

**Chip**

| <b>Antibodies</b> | <b>Source</b>             | <b>Cat number</b> | <b>Dilution</b> |
|-------------------|---------------------------|-------------------|-----------------|
| H3K4me3           | Diagenode                 | C15410003-50      | 5 µg per Chlp   |
| H3K27ac           | Diagenode                 | C15200184-50      | 5 µg per Chlp   |
| IgG               | Abcam                     | ab171870          | 5 µg per Chlp   |
| MYC               | Cell Signaling Technology | 9402              | 5 µg per Chlp   |

**Immunofluorescence**

| <b>Antibodies</b> | <b>Source</b>             | <b>Cat number</b> | <b>Dilution</b> |
|-------------------|---------------------------|-------------------|-----------------|
| Vimentin (D21H3)  | Cell Signaling Technology | 5741              | 1:150           |
| DHX9              | BETHYL Laboratories       | A300-855A         | 1:150           |
| NPM1              | Abcam                     | Ab10530           | 1:150           |

**Immunohistochemistry**

| <b>Antibodies</b> | <b>Source</b>             | <b>Cat number</b> | <b>Dilution</b> |
|-------------------|---------------------------|-------------------|-----------------|
| KRAS              | Abcam                     | ab180772          | 1:100           |
| NPM1              | Abcam                     | Ab10530           | 1:250           |
| DHX9              | Abcam                     | ab26271           | 1:100           |
| Casp3             | Cell Signaling Technology | 9662              | 1:500           |
| Ki67              | Abcam                     | ab15580           | 1:500           |

**Secondary antibodies**

| <b>Antibodies</b>                             | <b>Source</b>             | <b>Cat number</b> | <b>Dilution</b> |
|-----------------------------------------------|---------------------------|-------------------|-----------------|
| Anti-Rabbit IgG, HRP-linked Antibody          | Cell Signaling Technology | 7076              | 1:5000          |
| Anti-Rabbit IgG, HRP-linked Antibody          | Amersham                  | NA934             | 1:5000          |
| Donkey Anti-Mouse IgG H&L (Alexa Fluor® 488)  | Abcam                     | ab150105          | 1:500           |
| Donkey Anti-Rabbit IgG H&L (Alexa Fluor® 555) | Abcam                     | ab150074          | 1:500           |

**Supplementary Table 6. List of Plasmids used in this study**

| <b>Recombinant DNA</b>                | <b>Source</b>      | <b>Cat number</b> |
|---------------------------------------|--------------------|-------------------|
| Pgl3 Basic                            | Promega            | E1751             |
| pGL4.51[ <i>Luc2</i> /CMV/Neo] Vector | Promega            | E1320             |
| pmiRGLO                               | Promega            | E1330             |
| DHX9                                  | GeneCopoeia        | EX-H1793-M02      |
| NPM1 (FLAG-GFP)                       | Addgene            | 17578             |
| p21                                   | Origene            | RC201765          |
| KRAS <sup>WT</sup>                    | Shi et al. 1       | N/A               |
| KRAS <sup>G12D</sup>                  | Shi et al. 1       | N/A               |
| Gag:pol                               | Robert Hawkins lab | N/A               |
| VSVG                                  | Robert Hawkins lab | N/A               |
| REV                                   | Robert Hawkins lab | N/A               |
| FLAG-HA-pcDNA3.1                      | Addgene            | 52535             |
| WWP-Luc p21/WAF1 promoter             | Addgene            | 16451             |
| pSpCas9(BB)-2A-GFP                    | Addgene            | 48138             |
| pSpCas9(BB)-2A-GFP-sgDHX9             | This paper         | N/A               |
| pSpCas9(BB)-2A-GFP-sgNPM1             | This paper         | N/A               |
| pCDH-CMV-MCS-EF1-coGFP Lentivector    | System Biosciences | CD511B-1          |

## Supplementary References

1. Shi, L. *et al.* KRAS induces lung tumorigenesis through microRNAs modulation. *Cell Death Dis* **9**, 219 (2018).
